# Supplementary material
Source: PubMed Central journal article supplement (PMC3731037)

## Supplementary Material:

### Materials and Methods

#### Autopsy samples

The FFPE sample from 1918 influenza pandemic was derived from lung tissue from a patient who died in Camp Upton, NY in 1918 (previously reported in a published case series as case 19180924d [1]). The FFPE sample from the 2009 influenza pandemic was also derived from lung tissue from a patient who died in New York City, NY in 2009 (previously reported in a published case series as case 1 [2]).

#### RNA isolation

RNA was extracted from the FFPE autopsy sections **as follows**: One to three 6-micron sections were used in each case. After deparaffinization, the tissue pellets were digested by proteinase K as previously described [3,4]. RNA was isolated using TRIzol (Invitrogen). After precipitation, RNA was dissolved in 25ul DEPC water. RNA from the A549 cell line was isolated using TRIzol (Invitrogen), precipitated using ethanol, and DNase treated using PureLink® DNase (Life Technology).

#### Real-time PCR

First-strand cDNA was produced by using random primers **on** 2µl DNase I (Invitrogen) treated RNA. Real-time PCR was performed on ABI 7500 real-time PCR system (Applied Biosystems). **The reaction contained** 2µl of cDNA with 1x TaqMan® Universal PCR Master Mix (Applied Biosystems), 0.6-0.8 µM primers, **and** 0.2 µM probe. Ribosomal primers **were** Amplifluor® Human/Mouse 18S rRNA Primer Set (FAM labeled) from Millipore.  $\beta$ 2 microglobulin ( **$\beta$ 2M**) gene primer sequences **were**: Forward 5'-TGACTTTGTACAGCCCAAGATA-3', Reverse 5'-AATCCAAATGCGGCATCTTC-3'; ( **$\beta$ 2M** -probe VIC-TGATGCTGCTTACATGTCTCGATCCCA-TAMRA. Thermocycling conditions were: 50 °C for 2 min and 95 °C for 10 min, followed by 40 cycles of 95 °C for 15 s, and 60 °C for 1 min.

#### Library preparation and deep sequencing

The construction of total RNA libraries from FFPE samples was performed according to Illumina mRNA-seq sample preparation kit (Illumina, San Diego, CA) specifications but skipping the poly-A selection and RNA fragmentation steps. Briefly, cDNA was synthesized from input **total RNA (~300ng)** using random primers, modified and enriched. **Following** that, 2 rounds of **Duplex-Specific Nuclease (DSN)** (Evrogen, Moscow, Russia) [5] treatments were performed according to **the** Illumina DSN normalization procedure. The construction of the mRNA-seq library from mock-infected A549 cell was done according to the Illumina mRNA-seq sample preparation kit (Illumina, San Diego, CA). The **resulting** libraries were **hybridized** to the Illumina flowcell **and amplified** using cBot. The selected cDNA fragment sizes of the libraries were ~250bp. The library from the 2009 flu pandemic sample was sequenced in 7 lanes on one flowcell with a 76-cycle single end run, and the library from the 1918 flu pandemic sample was sequenced in 7 lanes on another flowcell with a 36-cycle single end run, both using the Genome Analyzer IIx (Illumina, San Diego, CA). Each flowcell contained a PhiX control in lane 4. The library from the uninfected A549 cells was sequenced in 1 lane on the flowcell with an 80-cycle single end run. From the 2009 pandemic sample, more than 243 million reads (of a total of >22GB of sequence) were

generated. From 1918 pandemic sample, more than 238 million reads (of a total of ~7.8 GB of sequence) were generated. From uninfected A549 cells, more than 42 millions reads (of a total of >3.3 GB of sequences) were generated in one sequencing lane. All sequences from this study have been deposited as a series at NCBI's SRA database (accession number pending).

#### Sequence analysis

Sequences analysis was performed in the following steps: 1) Reads were mapped to the bowtie-indexed 1918 pandemic influenza genome (A/Brevig\_Mission/1/18(H1N1)) or the 2009 pandemic influenza genome (A/California/04/2009(H1N1)), downloaded from GenBank, as well as the pre-built index of the human genome (UCSC hg19), downloaded from the Center for Bioinformatics and Computational Biology, University of Maryland website ([ftp://ftp.cbcb.umd.edu/pub/data/bowtie\\_indexes/hg19.ebwt.zip](ftp://ftp.cbcb.umd.edu/pub/data/bowtie_indexes/hg19.ebwt.zip)) using Tophat (release 1.0.14) (<http://tophat.cbcb.umd.edu/>) [6]. 2) Reads that were mapped to the 1918 or 2009 influenza pandemic genomes and the human genome were screened out. 3) The remaining sequences were assembled *de novo* by ABySS [7] version 1.3.4 ([www.bcgsc.ca/platform/bioinfo/software/abyss](http://www.bcgsc.ca/platform/bioinfo/software/abyss)). Data from the 2009 autopsy sample was assembled with a k-mer size of 36bp and data from the 1918 autopsy sample was assembled with a k-mer size of 28bp. 4) The generated contigs from the 2009 autopsy sample with a length of at least 76bp, and the contigs from 1918 autopsy sample with a length of at least 48bp were retained. 5) These contigs were then searched against the NCBI non-redundant nucleotide (nt) database (as downloaded on August 15, 2010) and the NCBI bacterial genome database by blastn program (blastall 2.2.23) [8]. 6) These blast outputs were subsequently analyzed by the metagenomic analyzer software package, MEGAN [9,10] version 4.67.5 ([www-ab.informatik.uni-tuebingen.de/software/megan](http://www-ab.informatik.uni-tuebingen.de/software/megan)) and taxonomical names were assigned to each of the contigs. The cutoffs used in MEGAN were: bit score =100, min support =5, and top % = 5 for blast results from the 2009 sample contigs, and bit score =70, min support =5 and top % = 5 for blast results from the 1918 sample contigs. Overall gene expression level (in terms of Fragments Per Kilobase of exon per Million fragments mapped (FPKM) [11] which is similar to Reads Per Kilobase per Million mapped reads (RPKM) [12]) were calculated using the Cufflink package (release 0.8.2) (<http://cufflinks.cbcb.umd.edu/>) [11]. Differentially expressed genes observed between the 1918 pandemic and the 2009 pandemic samples were identified by the Cuffdiff function from the Cufflink package (release 0.8.2) (<http://cufflinks.cbcb.umd.edu/>) [11]. SAMtools (release 0.1.8) was used to identify SNPs [13]. Sequences obtained in both runs were mapped to the human genome (UCSC hg19) downloaded from the Center for Bioinformatics and Computational Biology, University of Maryland using Tophat [6]. Default settings supplied with these software packages were used in most of the analyses. Functional analysis was performed using the Genomatix Pathway System (GePS) component of the Genomatix Genome Analyzer [14] (Genomatix Software GmbH, Munich, Germany) and Spotfire Silver (TIBCO, Palo Alto, CA).

After screening out the reads that were mapped to the IAV and human genomes, the remaining reads were assembled by ABySS [7,9,10]. From the 2009 sample, using a k mer size of 36bp, a total of 610,345 contigs were obtained, and among them, 9,948 contigs had a length of at least 76bp. From the 1918 autopsy sample, using a k mer size of 28bp, a total of 1,543,846 contigs were obtained, and among them, 29,147 contigs had a length of at least 48bp. The contigs with at least 76bp from the 2009 sample and those with lengths of

at least 48bp from the 1918 sample were searched against the NCBI non-redundant nucleotide (nt) database and the NCBI bacterial genome database using the blastn program (blastall 2.2.23) [8]. The blast outputs were analyzed by the metagenomic analyzer software package, MEGAN [9,10] and used to assign their taxonomical names.

## References

1. Sheng ZM, Chertow DS, Ambroggio X, *et al.* Autopsy series of 68 cases dying before and during the 1918 influenza pandemic peak. *Proceedings of the National Academy of Sciences of the United States of America* 2011; **108**: 16416-16421.
2. Gill JR, Sheng ZM, Ely SF, *et al.* Pulmonary pathologic findings of fatal 2009 pandemic influenza A/H1N1 viral infections. *Arch Pathol Lab Med* 2010; **134**: 235-243.
3. Krafft AE, Duncan BW, Bijwaard KE, *et al.* Optimization of the Isolation and Amplification of RNA From Formalin-fixed, Paraffin-embedded Tissue: The Armed Forces Institute of Pathology Experience and Literature Review. *Mol Diagn* 1997; **2**: 217-230.
4. Runstadler JA, Happ GM, Slemons RD, *et al.* Using RRT-PCR analysis and virus isolation to determine the prevalence of avian influenza virus infections in ducks at Minto Flats State Game Refuge, Alaska, during August 2005. *Arch Virol* 2007; **152**: 1901-1910.
5. Zhulidov PA, Bogdanova EA, Shcheglov AS, *et al.* Simple cDNA normalization using kamchatka crab duplex-specific nuclease. *Nucleic acids research* 2004; **32**: e37.
6. Trapnell C, Pachter L, Salzberg SL. TopHat: discovering splice junctions with RNA-Seq. *Bioinformatics (Oxford, England)* 2009; **25**: 1105-1111.
7. Simpson JT, Wong K, Jackman SD, *et al.* ABySS: a parallel assembler for short read sequence data. *Genome Res* 2009; **19**: 1117-1123.
8. Altschul SF, Madden TL, Schaffer AA, *et al.* Gapped BLAST and PSI-BLAST: a new generation of protein database search programs. *Nucleic acids research* 1997; **25**: 3389-3402.
9. Huson DH, Auch AF, Qi J, *et al.* MEGAN analysis of metagenomic data. *Genome Res* 2007; **17**: 377-386.
10. Huson DH, Mitra S, Ruscheweyh HJ, *et al.* Integrative analysis of environmental sequences using MEGAN4. *Genome Res* 2011; **21**: 1552-1560.
11. Trapnell C, Williams BA, Pertea G, *et al.* Transcript assembly and quantification by RNA-Seq reveals unannotated transcripts and isoform switching during cell differentiation. *Nature biotechnology* 2010; **28**: 511-515.
12. Mortazavi A, Williams BA, McCue K, *et al.* Mapping and quantifying mammalian transcriptomes by RNA-Seq. *Nat Methods* 2008; **5**: 621-628.
13. Li H, Handsaker B, Wysoker A, *et al.* The Sequence Alignment/Map format and SAMtools. *Bioinformatics (Oxford, England)* 2009; **25**: 2078-2079.
14. Werner T. Next generation sequencing in functional genomics. *Briefings in bioinformatics* 2010; **11**: 499-511.

## Supplementary Tables

Supplementary Table 1. Identified SNPs from 2009 autopsy sample

| segment      | aa pos. | nt pos. | Cov.  | Ref. | snp      | changes        | type   | Exist in 09<br>May-Dec |
|--------------|---------|---------|-------|------|----------|----------------|--------|------------------------|
| FJ969512_NP  | 100     | 298     | 25152 | G    | A(99.6%) | GTA(V)->ATA(I) | nonsyn | Yes                    |
| FJ969512_NP  | 381     | 1143    | 22446 | G    | A(99.9%) | CTG(L)->CTA(L) | syn    | Yes                    |
| FJ969512_NP  | 416     | 1248    | 20427 | G    | A(99.9%) | CGG(R)->CGA(R) | syn    | Yes                    |
| FJ969513_MP  | 164     | 492     | 51510 | G    | A(99.5%) | CAG(Q)->CAA(Q) | syn    | Yes                    |
| FJ969513_MP  | 200     | 600     | 54213 | G    | A(99.3%) | GCG(A)->GCA(A) | syn    | Yes                    |
| FJ969513_MP  | 247     | 741     | 26846 | G    | A(99.7%) | CAG(Q)->CAA(Q) | syn    | Yes                    |
| FJ969514_NS  | 123     | 367     | 9249  | A    | G(99.7%) | ATC(I)->GTC(V) | nonsyn | Yes                    |
| FJ969515_PA  | 224     | 670     | 7021  | C    | T(97.5%) | CCC(P)->TCC(S) | nonsyn | Yes                    |
| FJ969515_PA  | 307     | 919     | 12403 | G    | A(11.3%) | GCA(A)->ACA(T) | nonsyn | No                     |
| FJ969515_PA  | 557     | 1671    | 9361  | G    | A(23.4%) | GTG(V)->GTA(V) | syn    | Yes                    |
| FJ969515_PA  | 662     | 1986    | 13664 | T    | G(99.8%) | TCT(S)->TCG(S) | syn    | Yes                    |
| FJ969516_PB2 | 406     | 1218    | 6718  | G    | A(99.7%) | CAG(Q)->CAA(Q) | syn    | Yes                    |
| FJ969516_PB2 | 551     | 1651    | 11306 | C    | A(11.2%) | CAA(Q)->AAA(K) | nonsyn | No                     |
| FJ969516_PB2 | 591     | 1772    | 3091  | G    | C(22.6%) | CGG(R)->CCG(P) | nonsyn | No                     |
| FJ969516_PB2 | 624     | 1872    | 3996  | C    | T(97.1%) | GCC(A)->GCT(A) | syn    | Yes                    |
| FJ969516_PB2 | 665     | 1994    | 13712 | T    | A(11.9%) | CTT(L)->CAT(H) | nonsyn | No                     |
| FJ969516_PB2 | 721     | 2163    | 58880 | G    | A(99.2%) | AAG(K)->AAA(K) | syn    | Yes                    |
| FJ969517_NA  | 106     | 316     | 8440  | G    | A(99.7%) | GTA(V)->ATA(I) | nonsyn | Yes                    |
| FJ969517_NA  | 110     | 328     | 8661  | T    | C(13.4%) | TCC(S)->CCC(P) | nonsyn | No                     |
| FJ969517_NA  | 248     | 742     | 8267  | A    | G(99.9%) | AAT(N)->GAT(D) | nonsyn | Yes                    |
| FJ969517_NA  | 348     | 1044    | 20971 | G    | A(99.4%) | GGG(G)->GGA(G) | syn    | Yes                    |
| FJ969517_NA  | 356     | 1068    | 20988 | T    | G(10.5%) | GGT(G)->GGG(G) | syn    | Yes                    |
| FJ969517_NA  | 377     | 1131    | 18213 | G    | A(99.8%) | CCG(P)->CCA(P) | syn    | Yes                    |
| GQ117044_HA  | 70      | 209     | 24223 | G    | A(99.8%) | GGT(G)->GAT(D) | nonsyn | No                     |
| GQ117044_HA  | 100     | 298     | 17367 | C    | T(99.6%) | CCT(P)->TCT(S) | nonsyn | Yes                    |
| GQ117044_HA  | 214     | 640     | 44480 | A    | G(99.7%) | ACA(T)->GCA(A) | nonsyn | Yes                    |
| GQ117044_HA  | 220     | 658     | 50616 | T    | A(99.9%) | TCA(S)->ACA(T) | nonsyn | Yes                    |
| GQ117044_HA  | 297     | 891     | 23905 | A    | G(99.8%) | CAA(Q)->CAG(Q) | syn    | Yes                    |
| GQ117044_HA  | 338     | 1012    | 23994 | A    | G(99.6%) | ATC(I)->GTC(V) | nonsyn | Yes                    |
| GQ117044_HA  | 470     | 1408    | 19061 | C    | T(99.5%) | CTA(L)->TTA(L) | syn    | Yes                    |
| GQ377049_PB1 | 363     | 1089    | 20684 | G    | A(99.7%) | AAG(K)->AAA(K) | syn    | Yes                    |
| GQ377049_PB1 | 586     | 1758    | 17002 | A    | G(96.5%) | AAA(K)->AAG(K) | syn    | Yes                    |

aa pos.: amino acid position; nt pos.: nucleotide position; Cov.: coverage; Ref.: reference nucleotide; syn: synonymous mutation; nonsyn: non-synonymous mutation.

Supplementary Table 2. Identified SNPs from 1918 autopsy sample

| segment      | aa pos. | nt pos. | coverage | Ref. | snp      | changes        | type   |
|--------------|---------|---------|----------|------|----------|----------------|--------|
| AF117241_HA  | 128     | 384     | 1266     | T    | C(98.4%) | TTT(F)->TTC(F) | syn    |
| AF117241_HA  | 158     | 472     | 1984     | G    | A(70.9%) | GCA(A)->ACA(T) | nonsyn |
| AF117241_HA  | 239     | 715     | 2487     | G    | A(92.0%) | GAT(D)->AAT(N) | nonsyn |
| AF250356_NA  | 154     | 462     | 664      | C    | T(100%)  | CCC(P)->CCT(P) | syn    |
| AF250356_NA  | 175     | 523     | 2091     | G    | A(13.4%) | GAA(V)->AAA(K) | nonsyn |
| AF250356_NA  | 256     | 768     | 108      | A    | C(100%)  | TTA(L)->TTC(F) | nonsyn |
| AF250356_NA  | 300     | 900     | 1086     | T    | C(100%)  | AAT(N)->AAC(N) | syn    |
| AF250356_NA  | 466     | 1397    | 459      | G    | C(100%)  | AGC(S)->ACC(T) | nonsyn |
| AF333238_NS  | 75      | 224     | 729      | A    | G(97.4%) | GAG(E)->GGG(G) | nonsyn |
| AY130766_MP  | 4       | 10      | 422      | T    | C(90.5%) | TTA(L)->CTA(L) | syn    |
| AY130766_MP  | 74      | 220     | 1279     | C    | T(21.3%) | CTG(L)->TTG(L) | syn    |
| AY130766_MP  | 90      | 269     | 2020     | C    | T(11.9%) | CCA(P)->CTA(L) | nonsyn |
| AY130766_MP  | 234     | 700     | 2502     | A    | C(96.2%) | ATT(I)->CTT(L) | nonsyn |
| AY744935_NP  | 168     | 504     | 4870     | A    | G(91.8%) | CAA(Q)->CAG(Q) | syn    |
| AY744935_NP  | 329     | 987     | 3659     | A    | G(95.5%) | GTA(V)->GTG(V) | syn    |
| DQ208310_PB1 | 54      | 161     | 6346     | G    | A(98.9%) | AGA(R)->AAA(K) | nonsyn |
| DQ208310_PB1 | 375     | 1124    | 219      | G    | A(38.8%) | AGC(S)->AAC(N) | nonsyn |
| DQ208311_PA  | 151     | 453     | 593      | T    | A(100%)  | ACT(T)->ACA(T) | syn    |
| DQ208311_PA  | 152     | 456     | 636      | G    | A(99.5%) | GGG(G)->GGA(G) | syn    |
| DQ208311_PA  | 158     | 473     | 383      | A    | G(91.1%) | AAG(K)->AGG(R) | nonsyn |
| DQ208311_PA  | 174     | 522     | 1695     | A    | G(95.6%) | AAG(R)->AGG(R) | syn    |
| DQ208311_PA  | 278     | 834     | 3308     | G    | A(11.6%) | CAG(Q)->CAA(Q) | syn    |
| DQ208311_PA  | 416     | 1246    | 2651     | G    | A(11.3%) | GAA(E)->AAA(K) | nonsyn |
| DQ208311_PA  | 516     | 1548    | 1518     | C    | T(98.6%) | GAC(D)->GAT(D) | syn    |
| DQ208311_PA  | 570     | 1710    | 674      | A    | C(96.1%) | ACA(T)->ACC(T) | syn    |

aa pos.: amino acid position; nt pos.: nucleotide position; ref.: reference nucleotide; syn: synonymous mutation; nonsyn: non-synonymous mutation.

**Supplementary Table 3:****Common upregulated host genes in 1918 and 2009 autopsy samples vs mock A549 cells**

| gene_id    | 2009 RPKM/mock RPKM | Log(ratio) | 1918 RPKM/Mock RPKM | Log(ratio) |
|------------|---------------------|------------|---------------------|------------|
| 41156      | 1.026685432         |            | 1.514482165         |            |
| A2M        | 7.061184732         |            | 7.087848828         |            |
| ABCA1      | 1.063292049         |            | 1.245789347         |            |
| ABL2       | 5.883097338         |            | 6.191847679         |            |
| ACSL1      | 0.743984803         |            | 1.024326145         |            |
| ACSL4      | 0.911867819         |            | 0.550314521         |            |
| ACTA2      | 1.281056284         |            | 1.180036588         |            |
| ACTG2      | 6.134489483         |            | 6.121060595         |            |
| ACVRL1     | 5.814230277         |            | 6.477187841         |            |
| ADAM19     | 1.087878632         |            | 1.371396013         |            |
| ADAM8      | 0.377211187         |            | 0.79808054          |            |
| ADAMTS1    | 1.942829014         |            | 2.189136934         |            |
| ADAMTS4    | 2.539992299         |            | 3.084463716         |            |
| ADAMTSL4   | 0.959939203         |            | 1.386156064         |            |
| ADAP2      | 0.544988362         |            | 0.85170704          |            |
| ADH1B      | 2.342966726         |            | 2.928979321         |            |
| ADH1C      | 0.607992444         |            | 1.413739438         |            |
| ADORA2A    | 0.976056539         |            | 1.867470338         |            |
| AEBP1      | 2.94990204          |            | 3.375475979         |            |
| AFF1       | 0.595952072         |            | 0.729366909         |            |
| AGTRAP     | 6.19629504          |            | 6.619073495         |            |
| AK2        | 6.568979236         |            | 6.519482783         |            |
| AKAP2      | 0.772422497         |            | 0.944437042         |            |
| ALDOC      | 0.508651002         |            | 0.96346625          |            |
| ALOX5      | 0.924851173         |            | 1.240003159         |            |
| ALOX5AP    | 2.822579479         |            | 2.6069352           |            |
| ALPL       | 1.483408392         |            | 2.27568999          |            |
| AMPD3      | 1.394363537         |            | 1.5366759           |            |
| ANP32A-IT1 | 1.565120198         |            | 1.732733827         |            |
| ANTXR2     | 1.779937716         |            | 1.916588133         |            |
| AOC3       | 1.355111745         |            | 2.050976895         |            |
| AOC4       | 1.631526025         |            | 2.498336903         |            |
| APBB1IP    | 0.488751615         |            | 1.282211551         |            |
| APOBEC3A   | 0.372420018         |            | 1.143366661         |            |
| APOBR      | 1.670601875         |            | 2.70379607          |            |
| APOL3      | 6.552241011         |            | 6.825650672         |            |
| APOL6      | 1.381834019         |            | 1.37055413          |            |
| AQP1       | 1.638526329         |            | 1.759449707         |            |
| AQP9       | 6.292878262         |            | 6.566812108         |            |
| ARHGAP31   | 1.562897753         |            | 1.926139998         |            |
| ARHGAP9    | 5.701508406         |            | 6.442945171         |            |
| ARHGDIB    | 0.796885455         |            | 1.098330992         |            |
| ARHGEF15   | 5.421774979         |            | 6.055943769         |            |
| ARHGEF35   | 1.28861388          |            | 1.227858931         |            |

|           |             |             |
|-----------|-------------|-------------|
| ARHGEF5   | 0.885340678 | 1.01273837  |
| ARID5B    | 1.02404764  | 1.219024557 |
| ARMCX3    | 0.470748693 | 0.391221808 |
| ARMCX6    | 6.177986432 | 6.408675738 |
| ARNTL     | 5.493147032 | 6.035785834 |
| ARRDC3    | 0.737934887 | 0.795986323 |
| ASH1L     | 0.415142624 | 0.422409803 |
| ASPH      | 6.453304577 | 6.395289691 |
| ATP13A4   | 2.746405241 | 2.781370223 |
| ATP2B4    | 0.475516226 | 0.6839801   |
| B2M       | 1.018929835 | 1.072676248 |
| BACH1     | 0.500444161 | 0.6219927   |
| BATF2     | 0.697542838 | 1.541462747 |
| BCL2A1    | 6.908383135 | 6.549721585 |
| BGN       | 6.344753708 | 6.718507502 |
| BIN2      | 0.924903469 | 1.768456087 |
| BIRC3     | 0.528003363 | 0.646793332 |
| BST2      | 1.425908118 | 2.27634949  |
| BTK       | 5.864701488 | 6.06409093  |
| BTN3A1    | 0.940222506 | 1.291890248 |
| BTN3A2    | 0.865254122 | 1.174248765 |
| BTN3A3    | 6.093204484 | 6.430499141 |
| BTNL9     | 0.447536305 | 1.134632108 |
| C10orf10  | 0.82746344  | 1.302855908 |
| C10orf116 | 0.745918322 | 1.321438674 |
| C11orf96  | 1.519334525 | 2.469799842 |
| C19orf59  | 6.276275638 | 6.582687071 |
| C19orf69  | 2.227497122 | 2.098209243 |
| C1orf162  | 2.190299041 | 2.580715582 |
| C1orf38   | 1.559348569 | 1.83017294  |
| C1QA      | 5.619942298 | 6.539877423 |
| C1QB      | 6.119318587 | 6.654968335 |
| C1QC      | 6.120567351 | 6.846552968 |
| C1R       | 0.423899195 | 0.76338555  |
| C20orf118 | 1.444978144 | 1.832378682 |
| C21orf96  | 5.68862802  | 6.111622036 |
| C22orf34  | 2.280395103 | 2.990160742 |
| C3AR1     | 5.835687401 | 6.176311246 |
| C5AR1     | 1.154119025 | 0.865894237 |
| C5orf56   | 1.385366616 | 1.629684776 |
| C5orf62   | 0.548135054 | 0.845897525 |
| C7        | 6.259285607 | 6.286339684 |
| C7orf54   | 2.071824438 | 2.469269343 |
| C8orf39   | 0.71097454  | 0.988902722 |
| C9orf25   | 6.086580482 | 6.539605465 |
| C9orf84   | 5.430431444 | 6.081149201 |
| CARD16    | 6.544138767 | 6.377441036 |

|           |             |             |
|-----------|-------------|-------------|
| CASP1     | 6.320204465 | 6.747288261 |
| CASP4     | 0.894675843 | 0.787227414 |
| CASP8     | 0.43219945  | 0.418011118 |
| CBL       | 0.786498384 | 0.802523747 |
| CBLB      | 1.029420768 | 0.908307604 |
| CC2D2A    | 0.404965067 | 0.788666841 |
| CCDC102B  | 6.076294472 | 6.127490307 |
| CCDC69    | 0.99055313  | 1.549606162 |
| CCL18     | 6.3571589   | 6.33933018  |
| CCL19     | 5.831360347 | 6.490500658 |
| CCL2      | 1.000570254 | 0.952023755 |
| CCL21     | 5.880122743 | 6.534467795 |
| CCL3      | 6.791871626 | 6.821243566 |
| CCL3L3    | 7.472578016 | 6.859952661 |
| CCL4      | 6.986368145 | 7.025637605 |
| CCL4L1    | 7.76265156  | 7.200010086 |
| CCL5      | 6.404205759 | 6.554117094 |
| CCL7      | 6.270322405 | 6.283113446 |
| CCL8      | 6.491143091 | 6.33402729  |
| CCND2     | 5.857337925 | 6.341515638 |
| CCR1      | 5.597016894 | 6.33577473  |
| CCRL2     | 1.8750664   | 2.260556261 |
| CD163     | 6.313369394 | 6.82482587  |
| CD177     | 2.980672896 | 3.39784605  |
| CD248     | 2.387814347 | 2.84105212  |
| CD274     | 2.576707593 | 2.167710992 |
| CD300A    | 5.548339044 | 6.146748014 |
| CD300E    | 5.761715147 | 6.446355396 |
| CD300LF   | 2.088377525 | 2.849485093 |
| CD34      | 5.960709027 | 6.220516029 |
| CD37      | 0.807660305 | 1.542174121 |
| CD3E      | 6.039092741 | 6.02738223  |
| CD4       | 6.003744799 | 6.471809328 |
| CD40      | 0.600723007 | 0.750003284 |
| CD46      | 6.288419153 | 6.093183458 |
| CD48      | 6.537514353 | 6.510822388 |
| CD52      | 6.700433713 | 6.461358942 |
| CD74      | 2.369082338 | 3.358249741 |
| CD93      | 6.191677325 | 6.471816655 |
| CDH5      | 1.449393866 | 1.94245196  |
| CDR1      | 1.720383798 | 1.164200981 |
| CECR1     | 5.957142099 | 6.182859562 |
| CFLAR     | 0.625511566 | 0.680828886 |
| CFLAR-AS1 | 1.684497942 | 1.976671544 |
| CH25H     | 5.881230543 | 6.180490025 |
| CHI3L1    | 5.753539397 | 6.558672578 |
| CHI3L2    | 6.037275066 | 6.895225245 |



|            |             |             |
|------------|-------------|-------------|
| CHRD11     | 5.969060223 | 6.318976897 |
| CISH       | 5.675126411 | 6.369471904 |
| CLEC1A     | 5.947650815 | 6.072870925 |
| CLEC4E     | 2.270823054 | 2.596641679 |
| CLIC4      | 0.668956361 | 0.415382366 |
| CLIC5      | 5.433043003 | 6.239186823 |
| CLMP       | 1.003690589 | 0.939298653 |
| CMAHP      | 6.089597819 | 6.253100436 |
| CMPK2      | 1.998481032 | 1.945965961 |
| COL1A1     | 0.875589045 | 1.242419638 |
| COL1A2     | 2.868382299 | 3.235959368 |
| COL4A1     | 1.129178848 | 1.180931374 |
| COL6A2     | 0.585503705 | 1.220753236 |
| COL6A3     | 6.366915812 | 6.807832573 |
| CR1        | 5.738920018 | 6.201812101 |
| CRISPLD2   | 1.196436051 | 1.499440571 |
| CRLF3      | 0.511608401 | 0.445883048 |
| CRYAB      | 0.780525651 | 1.300500648 |
| CRYBA1     | 5.562421349 | 6.068282361 |
| CSF2RB     | 5.937945958 | 6.401229892 |
| CSF3R      | 5.799145418 | 6.767130624 |
| CSGALNACT2 | 0.60738895  | 0.571994878 |
| CSRP2      | 0.406550542 | 0.44275765  |
| CST7       | 1.449951555 | 2.089695747 |
| CSTA       | 1.468138104 | 1.426836052 |
| CTSE       | 5.954940198 | 6.185658291 |
| CX3CL1     | 1.507727147 | 2.010582105 |
| CXCL1      | 0.931167569 | 0.761159252 |
| CXCL10     | 6.82576615  | 6.773826656 |
| CXCL12     | 6.387315064 | 6.748244637 |
| CXCL17     | 5.341741094 | 6.217331256 |
| CXCL2      | 0.69358754  | 0.898269662 |
| CXCL9      | 5.882924497 | 6.074534862 |
| CXCR1      | 5.619563909 | 6.058775142 |
| CXCR4      | 1.841660811 | 2.23396835  |
| CYBB       | 2.971352925 | 2.927586653 |
| CYGB       | 0.912057938 | 1.455137379 |
| CYP3A5     | 0.483597777 | 0.628001387 |
| CYP7B1     | 1.796418572 | 1.850730686 |
| CYTH4      | 1.465313345 | 2.233542354 |
| DARC       | 6.499070937 | 6.311310867 |
| DCN        | 6.68661929  | 6.783573447 |
| DCUN1D3    | 0.836955735 | 0.711849036 |
| DDX60      | 1.571939425 | 1.571681444 |
| DDX60L     | 1.279232989 | 1.110105871 |
| DEFA1      | 8.091037038 | 6.518834936 |
| DEFB4A     | 6.974386406 | 6.21054591  |

|         |             |             |
|---------|-------------|-------------|
| DEFB4B  | 7.097902544 | 6.342343711 |
| DES     | 2.763104906 | 2.57763808  |
| DGKH    | 1.326029384 | 1.145195952 |
| DHX58   | 1.820655532 | 2.224612463 |
| DICER1  | 0.482416885 | 0.523548604 |
| DKK3    | 0.381634857 | 0.391259787 |
| DLC1    | 0.80703299  | 0.835041381 |
| DLL4    | 1.483061626 | 1.904823259 |
| DMTF1   | 6.135533354 | 6.0477498   |
| DNAJA4  | 5.926032567 | 6.550938547 |
| DNHD1   | 0.56976565  | 0.982752768 |
| DOCK2   | 2.205405599 | 2.326315894 |
| DOCK8   | 5.797282779 | 6.096409417 |
| DOK3    | 0.601745379 | 0.854650489 |
| DPYD    | 1.071096109 | 1.264907675 |
| DRAM1   | 0.519129581 | 0.615253653 |
| DTX3L   | 0.728731689 | 0.953984206 |
| DTX4    | 0.49235832  | 0.890400672 |
| DUOX1   | 5.826908237 | 6.481908206 |
| DUSP7   | 0.514720347 | 0.427423931 |
| EBI3    | 0.633748314 | 1.225744379 |
| ECSCR   | 2.417798926 | 2.206837506 |
| ELL2    | 1.005844276 | 0.753934163 |
| ELMO1   | 0.456208148 | 0.500675384 |
| EMILIN1 | 0.51758256  | 1.324073173 |
| EMILIN2 | 0.762688603 | 0.881189119 |
| EMR2    | 5.781196534 | 6.124005086 |
| ENG     | 5.919742107 | 6.631522909 |
| EPG5    | 0.613400545 | 0.828411193 |
| EPS15   | 0.615564089 | 0.478895656 |
| EPSTI1  | 6.345556037 | 6.531347331 |
| ERAP1   | 0.509178517 | 0.564986267 |
| ERV3-1  | 0.896086637 | 1.650097507 |
| ESAM    | 1.006187135 | 1.492832241 |
| ETS1    | 0.709466049 | 0.751422723 |
| ETV6    | 0.437094954 | 0.60589401  |
| EZH1    | 0.381849633 | 0.552931699 |
| F3      | 0.967150545 | 0.934712008 |
| FAM105B | 0.425795225 | 0.529529688 |
| FAM107A | 5.755235897 | 6.353854706 |
| FAM129A | 1.83411918  | 1.945590128 |
| FAM196B | 2.152943407 | 2.419454762 |
| FAM20A  | 5.627150705 | 6.287282057 |
| FAM65B  | 5.329971136 | 6.451441011 |
| FAS     | 1.259878683 | 0.764527199 |
| FBLN5   | 0.728247763 | 0.732674854 |
| FBN1    | 0.727162746 | 0.599608    |

|          |             |             |
|----------|-------------|-------------|
| FCER1G   | 2.644335791 | 2.771564545 |
| FCGR1B   | 5.395445218 | 6.239029056 |
| FCGR2C   | 6.599525013 | 6.300947472 |
| FCGR3B   | 6.075623595 | 6.599608005 |
| FCN1     | 5.718922493 | 6.479640082 |
| FCN3     | 6.485329533 | 6.873942238 |
| FES      | 5.353350646 | 6.287107199 |
| FFAR2    | 2.144164285 | 2.892469579 |
| FGR      | 6.424141399 | 6.753511053 |
| FHL1     | 0.913385455 | 0.751146828 |
| FILIP1L  | 2.25569214  | 2.388200369 |
| FKBP1AP1 | 0.630329613 | 1.085758851 |
| FKBP5    | 0.555192813 | 0.831325077 |
| FLI1     | 5.930219843 | 6.147852479 |
| FLJ42393 | 5.893827206 | 6.273642396 |
| FLJ43663 | 1.10670107  | 0.956051312 |
| FLJ45445 | 0.812636144 | 1.884696025 |
| FLT1     | 6.389885177 | 6.437687158 |
| FMNL3    | 0.946135113 | 1.139394279 |
| FMOD     | 2.130882007 | 2.439477279 |
| FNDC3A   | 0.524870644 | 0.481806561 |
| FOXF1    | 5.767505388 | 6.019270033 |
| FOXO3    | 0.698916613 | 0.668768125 |
| FOXO3B   | 0.644305525 | 0.674974924 |
| FPR1     | 6.353948912 | 6.969608786 |
| FPR2     | 6.169944682 | 6.592796102 |
| FRAS1    | 0.481575921 | 0.733454078 |
| FTH1P3   | 0.533281891 | 0.433923824 |
| FXYD6    | 1.416692835 | 1.890429855 |
| FYB      | 6.03210278  | 6.3005194   |
| FYN      | 1.71730629  | 1.717153486 |
| FZD4     | 0.924236451 | 1.23893962  |
| GOS2     | 1.401698203 | 1.485736763 |
| GAS7     | 5.922303411 | 6.409774247 |
| GBP1     | 3.534883919 | 3.744959296 |
| GBP1P1   | 6.367559041 | 6.82225833  |
| GBP2     | 1.837448444 | 1.898237658 |
| GBP3     | 1.134523745 | 1.229141705 |
| GBP4     | 6.34582054  | 6.396628197 |
| GBP5     | 6.044363341 | 6.553340426 |
| GCA      | 0.808497111 | 0.75370659  |
| GCH1     | 0.648776726 | 0.801592583 |
| GGT5     | 6.539391036 | 6.272217677 |
| GIMAP2   | 2.085683395 | 2.289454154 |
| GIMAP4   | 6.239244407 | 6.153595376 |
| GIMAP5   | 5.999151429 | 6.230172929 |
| GJA4     | 2.559094987 | 2.79132703  |

|           |             |             |
|-----------|-------------|-------------|
| GJA5      | 6.350939624 | 6.019954978 |
| GK3P      | 1.766652807 | 1.976805786 |
| GKN2      | 0.8130834   | 1.290396983 |
| GLDN      | 2.508629313 | 2.424365319 |
| GLIPR2    | 0.765183059 | 1.100929386 |
| GLUL      | 0.499028883 | 1.263215282 |
| GMFG      | 6.154904566 | 6.389616099 |
| GNA15     | 1.836273237 | 2.723888136 |
| GPBP1     | 0.450035673 | 0.424626688 |
| GPR116    | 6.260202611 | 6.420480548 |
| GPR133    | 1.129082705 | 1.54777398  |
| GPR137B   | 0.456433553 | 0.492065043 |
| GPR141    | 6.203171643 | 6.208449419 |
| GPR183    | 5.918486945 | 6.156821636 |
| GPR4      | 5.902194962 | 6.045733604 |
| GPR84     | 2.33817941  | 3.036017155 |
| GPR97     | 1.700896342 | 2.070978715 |
| GPX3      | 0.603502176 | 0.761304367 |
| GUSBP3    | 0.637381353 | 1.085256946 |
| GUSBP9    | 0.36751254  | 0.927210887 |
| GYPC      | 6.34443354  | 6.716805213 |
| HAVCR2    | 5.752178332 | 6.04289039  |
| HBA1      | 2.935884827 | 2.943549512 |
| HBA2      | 2.764044538 | 2.754775969 |
| HBB       | 2.896192567 | 1.854755294 |
| HCLS1     | 1.895209447 | 2.097572177 |
| HCST      | 0.861414774 | 1.815235235 |
| HECA      | 0.748443812 | 0.994357095 |
| HEG1      | 0.894038209 | 0.911691283 |
| HERC2P3   | 0.483564069 | 0.437590433 |
| HERC6     | 0.782397866 | 1.064157972 |
| HINT3     | 0.389490053 | 0.654706954 |
| HIST1H1B  | 5.570854539 | 6.315065147 |
| HIST1H1D  | 1.623312514 | 1.636404927 |
| HIST1H1E  | 1.48946444  | 1.649672762 |
| HIST1H2AB | 0.861187138 | 1.838342162 |
| HIST1H2AE | 5.642046843 | 6.265857468 |
| HIST1H2AG | 0.837548238 | 1.510192501 |
| HIST1H2AH | 1.099694938 | 1.393796011 |
| HIST1H2AI | 1.078810487 | 1.26114824  |
| HIST1H2AJ | 1.338813252 | 1.416924032 |
| HIST1H2AK | 0.77307793  | 1.440208596 |
| HIST1H2AL | 1.124368642 | 2.067133078 |
| HIST1H2AM | 0.902659626 | 1.586000294 |
| HIST1H2BB | 6.372772123 | 6.337369398 |
| HIST1H2BC | 0.815960743 | 1.082602706 |
| HIST1H2BD | 0.751224507 | 0.996177442 |

|            |             |             |
|------------|-------------|-------------|
| HIST1H2BE  | 0.487458941 | 1.327262677 |
| HIST1H2BG  | 2.358731615 | 2.497307876 |
| HIST1H2BH  | 1.180557625 | 1.396168746 |
| HIST1H2BI  | 5.792791477 | 6.386990947 |
| HIST1H2BJ  | 0.641885407 | 1.09780431  |
| HIST1H2BM  | 2.281397142 | 2.360943509 |
| HIST1H2BN  | 1.384379338 | 1.147306428 |
| HIST1H3B   | 1.087314324 | 1.741402136 |
| HIST1H3C   | 1.539239846 | 2.229041848 |
| HIST1H3D   | 2.409628112 | 2.748227738 |
| HIST1H3F   | 1.338209978 | 2.315045015 |
| HIST1H3G   | 5.98762337  | 6.418218403 |
| HIST1H3H   | 0.949880238 | 1.253743536 |
| HIST1H3J   | 1.046832574 | 1.56631344  |
| HIST1H4A   | 0.40568991  | 1.076566147 |
| HIST1H4B   | 1.227364914 | 1.765101205 |
| HIST1H4C   | 1.168312319 | 1.468212985 |
| HIST1H4D   | 0.926580733 | 2.05503309  |
| HIST1H4E   | 0.466412247 | 0.882109766 |
| HIST1H4F   | 5.656342604 | 6.742580604 |
| HIST1H4H   | 0.46783918  | 1.038960353 |
| HIST1H4I   | 0.403771551 | 1.567437801 |
| HIST1H4J   | 0.635653863 | 1.450323884 |
| HIST1H4K   | 0.603417949 | 1.406713003 |
| HIST1H4L   | 5.949072709 | 6.055672604 |
| HIST2H2AA3 | 0.582399925 | 0.986609669 |
| HIST2H2AB  | 1.417214593 | 1.831507037 |
| HIST2H2AC  | 0.579172692 | 0.998406516 |
| HIST2H2BA  | 1.314959546 | 1.432716972 |
| HIST2H2BE  | 0.911867075 | 0.963695914 |
| HIST2H2BF  | 1.826326156 | 1.832304765 |
| HIST2H3A   | 0.41927307  | 1.575098877 |
| HIST2H3C   | 0.41927307  | 1.575098877 |
| HIST2H3D   | 0.539452701 | 1.590102956 |
| HIST2H4A   | 0.710359201 | 1.150115977 |
| HK2        | 1.20679704  | 1.514020751 |
| HK3        | 1.97158947  | 2.845414278 |
| HLA-DQA1   | 6.534702418 | 6.149647036 |
| HLA-DRB5   | 6.455479837 | 6.795650649 |
| HMBX1      | 0.911237968 | 1.038158495 |
| HNRNPC     | 7.071940891 | 6.855362854 |
| HOPX       | 6.282529218 | 6.608287427 |
| HP         | 6.199200989 | 7.37940524  |
| HPR        | 2.066084642 | 3.584090072 |
| HS3ST3B1   | 0.885851825 | 0.85518638  |
| HSD11B1    | 6.139954609 | 6.266241107 |
| HSP90AB2P  | 0.656029871 | 0.474871461 |

|          |             |             |
|----------|-------------|-------------|
| HSPA6    | 1.406936492 | 2.724459294 |
| HSPA7    | 1.803545217 | 3.462158385 |
| HSPB6    | 1.936813232 | 1.874111746 |
| HYAL1    | 0.437142587 | 0.842545234 |
| ICAM1    | 1.889794852 | 2.293431994 |
| ICAM2    | 5.933129278 | 6.548187888 |
| IDO1     | 6.191797418 | 6.376635346 |
| IFI16    | 1.995693673 | 1.939392104 |
| IFI44    | 6.495134825 | 6.314875888 |
| IFI44L   | 6.380017576 | 6.527908173 |
| IFI6     | 1.048514511 | 1.676754524 |
| IFIH1    | 1.819321606 | 1.839839856 |
| IFIT1    | 1.582422714 | 1.807998647 |
| IFIT2    | 2.158583207 | 2.351490836 |
| IFIT3    | 6.470479584 | 6.603457255 |
| IFITM1   | 1.415605106 | 2.198911954 |
| IFITM3   | 0.805120259 | 1.8111385   |
| IGF1     | 6.068018793 | 6.34230817  |
| IGF2BP2  | 0.403066539 | 0.743032447 |
| IGFBP5   | 0.70100188  | 0.999648277 |
| IGLL5    | 7.240721434 | 7.057525373 |
| IL15RA   | 1.314209098 | 1.396370301 |
| IL18BP   | 0.959585072 | 1.522485914 |
| IL18R1   | 1.309494959 | 1.815896255 |
| IL1B     | 2.650214345 | 3.063181609 |
| IL1R1    | 0.46666683  | 0.724111055 |
| IL1R2    | 0.958124595 | 1.709182361 |
| IL1RL1   | 3.015715684 | 2.683411013 |
| IL1RN    | 6.311049946 | 6.631452901 |
| IL2RG    | 2.82013205  | 2.290145793 |
| IL32     | 1.563609519 | 2.504532562 |
| IL3RA    | 1.145702411 | 1.619982362 |
| IL6      | 6.672307562 | 6.468313354 |
| IL6ST    | 0.714489899 | 0.624686475 |
| IL7      | 5.338749245 | 6.255848769 |
| IL7R     | 2.447789304 | 2.509633174 |
| IL8      | 1.080442723 | 0.510156732 |
| IRAK3    | 6.167426633 | 6.373296441 |
| ISG15    | 0.455043729 | 1.252991299 |
| ITGA2    | 0.681716294 | 0.560989547 |
| ITGAL    | 5.739751088 | 6.216414    |
| ITGAX    | 1.224648479 | 1.57418376  |
| JAK3     | 0.880780594 | 1.73808974  |
| KCNJ15   | 5.477381753 | 6.176956091 |
| KCTD12   | 1.256896984 | 1.570287817 |
| KIAA0040 | 0.751320921 | 1.013200616 |
| KIAA0226 | 0.756062679 | 0.756158645 |

|              |             |             |
|--------------|-------------|-------------|
| KIAA0247     | 0.439554957 | 0.940437399 |
| KIAA1462     | 0.410203578 | 0.794273967 |
| KLF9         | 0.94619569  | 0.906230717 |
| KLHL6        | 6.053746666 | 6.050329479 |
| KREMEN1      | 0.500297267 | 0.818214721 |
| LAIR1        | 5.832685149 | 6.296932703 |
| LAMP3        | 2.880207752 | 2.707422345 |
| LAPTM5       | 2.877682182 | 2.986026619 |
| LCP1         | 2.359196875 | 2.610103137 |
| LCP2         | 6.387224265 | 6.375599608 |
| LGALS9       | 1.687471671 | 1.897179115 |
| LHFP         | 1.579709437 | 1.96878613  |
| LILRA5       | 6.205347842 | 6.450412323 |
| LILRA6       | 2.534717301 | 2.58059041  |
| LIMK2        | 0.810337636 | 1.173711571 |
| LIMS2        | 5.863147322 | 6.394052226 |
| LINC00085    | 0.47471956  | 0.904693947 |
| LINC00472    | 1.010482494 | 1.42086901  |
| LIPG         | 2.077955588 | 2.262774106 |
| LMO2         | 5.830162505 | 6.391913814 |
| LMO3         | 5.828993544 | 6.139765777 |
| LOC100129216 | 6.08009592  | 6.114180479 |
| LOC100129518 | 1.83788225  | 2.056807911 |
| LOC100129617 | 1.63149884  | 2.120662946 |
| LOC100129917 | 1.245036207 | 0.950674067 |
| LOC100132077 | 1.113659906 | 1.31557677  |
| LOC100132247 | 0.683847059 | 0.431547979 |
| LOC100133161 | 0.645103603 | 1.70587293  |
| LOC100133331 | 0.824180133 | 1.660796518 |
| LOC100170939 | 1.125528961 | 1.637239067 |
| LOC100190986 | 1.454292835 | 1.935228112 |
| LOC100270710 | 0.391134224 | 0.65367743  |
| LOC100271836 | 1.476982875 | 1.247322851 |
| LOC100288069 | 1.039454242 | 1.555277143 |
| LOC100288432 | 0.373001144 | 1.529458731 |
| LOC100506321 | 1.184883333 | 1.884406125 |
| LOC100506990 | 0.803075228 | 1.248613734 |
| LOC148696    | 2.625238083 | 3.035468254 |
| LOC154761    | 1.423473679 | 1.594830877 |
| LOC399744    | 0.429883362 | 1.082037362 |
| LOC400550    | 5.958448247 | 6.213177626 |
| LOC441454    | 0.637115943 | 1.309961533 |
| LOC541473    | 0.62005192  | 0.77396511  |
| LOC595101    | 0.407264518 | 1.009653536 |
| LOC613037    | 0.511769971 | 0.47263668  |
| LOC641298    | 1.47121816  | 1.241847862 |
| LOC643733    | 6.121175604 | 6.098491437 |

|           |             |             |
|-----------|-------------|-------------|
| LOC653513 | 2.334807565 | 2.822701817 |
| LOC654433 | 1.372865421 | 1.974268294 |
| LOC678655 | 1.318139034 | 1.739730015 |
| LOC729513 | 1.623207561 | 1.375663978 |
| LOC729603 | 1.087895345 | 1.418163115 |
| LOC729737 | 1.184199074 | 1.64132977  |
| LOC731275 | 0.704072978 | 1.580903696 |
| LOC731424 | 5.662589746 | 6.132298121 |
| LOC92249  | 0.411019053 | 0.409736986 |
| LPAR2     | 0.673507694 | 0.77067261  |
| LPHN2     | 0.745607584 | 0.434219311 |
| LPL       | 5.888865508 | 6.023235993 |
| LRG1      | 0.553141456 | 1.519798536 |
| LRRC25    | 5.463388258 | 6.158769452 |
| LRRC32    | 6.143907467 | 6.457457988 |
| LRRC37A3  | 0.621722887 | 1.08772162  |
| LRRK2     | 0.531250451 | 0.983551554 |
| LSP1      | 5.692534961 | 6.565488905 |
| LTBP2     | 0.545410036 | 0.833165407 |
| LTF       | 6.026247181 | 6.321208903 |
| LUM       | 2.773411101 | 2.532100301 |
| LYZ       | 2.26601958  | 1.678563193 |
| MACF1     | 0.502627599 | 0.449656194 |
| MAF       | 2.111516753 | 2.705115552 |
| MAFB      | 1.571406817 | 2.518517464 |
| MAOA      | 0.780746606 | 0.790483258 |
| MAPK13    | 1.783918056 | 2.167185812 |
| MARCO     | 2.454893013 | 3.012571369 |
| MAST4     | 0.774594424 | 1.27966946  |
| MATL2963  | 0.420399395 | 0.658590383 |
| MCAM      | 0.917034049 | 0.904303504 |
| MCTP2     | 5.931712575 | 6.240157208 |
| MEF2A     | 0.417125069 | 0.536029034 |
| MEFV      | 5.648578567 | 6.265855114 |
| MEIS1     | 1.362218154 | 1.175201206 |
| METTL7A   | 1.784585035 | 2.242715632 |
| MFSD7     | 1.181555474 | 1.929882211 |
| MGC12916  | 0.510939876 | 1.170457666 |
| MGP       | 6.197688465 | 6.25823009  |
| MILR1     | 0.812218629 | 1.177137635 |
| MIR1248   | 8.731137316 | 9.277625257 |
| MIR3939   | 7.69457449  | 7.333288038 |
| MIR4435-1 | 8.335237187 | 8.121851902 |
| MIR612    | 7.829795695 | 8.45890816  |
| MIR650    | 7.924331502 | 8.199058212 |
| MLL3      | 0.541886059 | 0.588871081 |
| MMP14     | 1.068904839 | 1.709306205 |



|              |             |             |
|--------------|-------------|-------------|
| MMP19        | 5.699508196 | 6.089735598 |
| MMP2         | 1.291989777 | 1.594022189 |
| MMP8         | 6.199848387 | 6.23055365  |
| MMP9         | 1.141080423 | 2.116068983 |
| MNDA         | 6.250846767 | 6.119193183 |
| MPHOSPH8     | 0.418720379 | 0.420460332 |
| MPP1         | 0.582850915 | 0.502563481 |
| MS4A6A       | 5.597020189 | 6.229474498 |
| MT1A         | 0.705308994 | 1.121558935 |
| MT1E         | 5.961335651 | 6.472242889 |
| MT1F         | 0.641900975 | 0.637674036 |
| MT1G         | 5.55522629  | 6.827978925 |
| MT1L         | 5.602713113 | 6.661993367 |
| MTF1         | 0.519050191 | 1.047860485 |
| MTRNR2L1     | 2.670763911 | 2.69490396  |
| MTRNR2L10    | 1.412464567 | 3.160802449 |
| MTRNR2L2     | 1.295798106 | 2.232745821 |
| MTRNR2L6     | 1.305113321 | 2.678466957 |
| MUTED-TXNDC5 | 6.28137203  | 6.124364002 |
| MX1          | 2.01639582  | 2.365668269 |
| MX2          | 3.064091568 | 3.132656108 |
| MYCBP2       | 0.591985454 | 0.506034515 |
| MYL9         | 0.816650545 | 1.576914305 |
| MYO1F        | 1.381632351 | 1.745647328 |
| MYO1G        | 1.716047633 | 2.066196384 |
| MZB1         | 1.263300757 | 1.630711357 |
| N4BP2L2      | 0.723622123 | 0.71047196  |
| NAIP         | 1.488698233 | 1.744400141 |
| NAMPT        | 1.044150204 | 0.600910304 |
| NAPSA        | 1.913195408 | 2.505455443 |
| NBPF14       | 0.570950465 | 0.588141689 |
| NBPF15       | 0.664646976 | 0.487379734 |
| NCF1         | 2.345251345 | 3.286127211 |
| NCF1B        | 2.286058536 | 3.285421609 |
| NCF1C        | 2.285890969 | 3.345579895 |
| NCF2         | 1.182665469 | 1.514131914 |
| NCF4         | 1.572517369 | 2.305495737 |
| NCKAP1L      | 2.608681113 | 2.766042427 |
| NDNF         | 2.338902943 | 2.390216552 |
| NEAT1        | 0.838949829 | 1.492273098 |
| NES          | 0.521366899 | 0.940804242 |
| NFE2         | 5.506610549 | 6.085882557 |
| NFIL3        | 0.562310378 | 0.587181562 |
| NFKBIZ       | 0.745449324 | 0.774643799 |
| NID1         | 0.91108832  | 0.9805775   |
| NKG7         | 1.926930527 | 3.200392561 |
| NLRC5        | 0.757669605 | 1.315917264 |

|          |             |             |
|----------|-------------|-------------|
| NOD2     | 1.856511446 | 2.542559123 |
| NOTCH2NL | 0.879334238 | 1.02094144  |
| NPIPL3   | 0.557278622 | 0.408692574 |
| NPNT     | 1.176638452 | 1.173847292 |
| NUMB     | 6.299642382 | 6.450329184 |
| OAS2     | 2.543294967 | 2.774111349 |
| OASL     | 1.457584185 | 1.744777404 |
| OLFML2B  | 1.415990433 | 1.4425329   |
| OLFML3   | 0.731818414 | 0.980917194 |
| OR2A20P  | 5.714123463 | 6.475698785 |
| OS9      | 6.108548112 | 6.574770676 |
| OSCAR    | 1.232734534 | 1.614893828 |
| P2RX7    | 5.725784264 | 6.204049404 |
| PAG1     | 2.430366808 | 2.404343546 |
| PARP10   | 0.806400969 | 1.504233524 |
| PARP14   | 0.772906085 | 0.918152995 |
| PARP9    | 1.052286194 | 0.987012386 |
| PARVG    | 5.767008107 | 6.647955783 |
| PCNX     | 0.616423474 | 0.582420424 |
| PDE4DIP  | 0.650901795 | 1.227388603 |
| PDGFB    | 0.605512446 | 1.401888947 |
| PDGFRA   | 2.810664742 | 2.781896964 |
| PDGFRB   | 5.806743512 | 6.324477947 |
| PEAK1    | 0.442197445 | 0.543022915 |
| PECAM1   | 6.246742249 | 6.094977452 |
| PGC      | 5.933053789 | 6.472956734 |
| PHC3     | 0.545406614 | 0.662113242 |
| PHF11    | 0.870811126 | 0.885748809 |
| PI3      | 1.386934345 | 1.84324188  |
| PIGR     | 5.679694933 | 6.420516831 |
| PIK3AP1  | 1.968271979 | 2.228402447 |
| PIK3R3   | 1.223320801 | 1.211196881 |
| PIK3R5   | 5.602504915 | 6.122897104 |
| PIKFYVE  | 0.456874302 | 0.685264857 |
| PILRA    | 5.428100762 | 6.640469511 |
| PIM2     | 0.554332109 | 0.697404073 |
| PLAC4    | 2.481797168 | 2.892511208 |
| PLAC8    | 0.92783956  | 1.329045837 |
| PLEK     | 6.118016581 | 6.424483078 |
| PLEKHA2  | 0.885215298 | 1.108563146 |
| PLEKHA4  | 2.130345519 | 2.004281432 |
| PLTP     | 1.24150566  | 1.76774672  |
| PLVAP    | 6.242591116 | 6.581242886 |
| PLXDC2   | 5.678633993 | 6.104415406 |
| PML      | 6.084107774 | 6.761715147 |
| PNRC1    | 0.39191321  | 0.52461663  |
| POU2AF1  | 2.47463278  | 2.45528603  |

|          |             |             |
|----------|-------------|-------------|
| PPP1R12B | 0.763956569 | 0.865595339 |
| PPP4R2   | 0.616925248 | 0.444716801 |
| PRDM2    | 0.439111205 | 0.489215476 |
| PRDX2    | 0.850108774 | 1.58563505  |
| PRF1     | 5.414896504 | 6.258062312 |
| PRICKLE2 | 0.652755625 | 0.873118544 |
| PRKCH    | 1.062849867 | 1.248337806 |
| PRRT2    | 0.96345331  | 1.566837207 |
| PRRX1    | 6.30832319  | 6.087650116 |
| PSTPIP2  | 2.544998646 | 2.726822106 |
| PTGER4   | 0.497377002 | 1.063535692 |
| PTGIR    | 1.67827179  | 2.335414845 |
| PTPRC    | 6.621093155 | 6.346452733 |
| PTPRG    | 0.736393748 | 1.017734884 |
| PTX3     | 6.618335787 | 6.603709346 |
| PXDN     | 1.422472555 | 1.433653825 |
| PZP      | 5.716316424 | 6.475422741 |
| RAB13    | 0.814704951 | 0.861565665 |
| RABGAP1L | 0.922531386 | 0.583483703 |
| RAC2     | 2.630874512 | 3.018181346 |
| RALGAPA2 | 0.5924079   | 0.905794576 |
| RAMP2    | 1.18231773  | 1.717000044 |
| RAMP3    | 2.328308014 | 2.811612498 |
| RAP1A    | 0.548437933 | 0.542672354 |
| RAPGEF5  | 2.238659624 | 2.175854015 |
| RAPH1    | 0.720783077 | 0.444913874 |
| RARRES2  | 5.536454907 | 6.416901671 |
| RARRES3  | 0.47688012  | 0.880545983 |
| RBPJ     | 0.688806875 | 0.477145338 |
| RC3H2    | 0.578581033 | 0.447612531 |
| RCAN1    | 0.45433381  | 0.599949725 |
| RETN     | 6.35220182  | 6.67775747  |
| RFTN1    | 1.080602546 | 1.449328435 |
| RGL4     | 0.985558977 | 1.393528738 |
| RGS16    | 2.244363439 | 2.367799924 |
| RHOU     | 0.450701121 | 0.84030046  |
| RMRP     | 1.57984692  | 2.578229377 |
| RNF122   | 0.484651635 | 0.756602225 |
| RNF144B  | 1.255022857 | 1.328064128 |
| RNF168   | 0.585779409 | 0.454067796 |
| RNF169   | 0.676273572 | 0.761128093 |
| RNF185   | 0.418863031 | 0.504700878 |
| RNU11    | 1.119625412 | 3.314694781 |
| RNU12    | 6.718129514 | 9.852764144 |
| RPGR     | 0.948511668 | 1.055245992 |
| RPL10    | 6.680230327 | 7.094254451 |
| RPL13AP3 | 0.524439501 | 1.637991046 |

|           |             |             |
|-----------|-------------|-------------|
| RPL23AP64 | 0.78792205  | 1.0777563   |
| RPPH1     | 1.576882716 | 3.010999322 |
| RPS6KA2   | 5.950612604 | 6.216007468 |
| RSAD2     | 6.700513347 | 6.447274345 |
| RUFY3     | 1.25714601  | 1.119244789 |
| RUNX1     | 0.459877705 | 0.608417655 |
| S100A12   | 6.879179059 | 6.986207681 |
| S100A8    | 7.625113783 | 7.336095334 |
| S100A9    | 2.772251345 | 3.203165771 |
| S1PR1     | 2.952681797 | 3.22373641  |
| SAA1      | 7.002645466 | 7.552741201 |
| SAA2      | 3.026515988 | 3.558160854 |
| SAMD9L    | 2.054833327 | 2.122106078 |
| SAMHD1    | 0.654962818 | 0.810448965 |
| SAMSN1    | 5.985290371 | 6.09417754  |
| SASH1     | 0.685151394 | 0.759679405 |
| SASH3     | 2.467082475 | 2.74836212  |
| SCARNA1   | 6.792640987 | 7.233280467 |
| SCARNA10  | 2.398898661 | 2.986970267 |
| SCARNA11  | 6.084240151 | 8.220393164 |
| SCARNA12  | 0.378181649 | 0.989452063 |
| SCARNA13  | 2.815843652 | 3.588094205 |
| SCARNA18  | 7.1154574   | 7.620172505 |
| SCARNA2   | 1.235391573 | 2.919997031 |
| SCARNA21  | 0.535229046 | 1.757012538 |
| SCARNA3   | 7.392895593 | 7.711529698 |
| SCARNA4   | 7.603093467 | 7.966471202 |
| SCARNA5   | 7.292741058 | 7.893755106 |
| SCARNA6   | 1.14127724  | 1.479901138 |
| SCARNA7   | 2.063592853 | 2.631341769 |
| SCARNA8   | 6.846995478 | 8.43205005  |
| SCARNA9   | 0.708277628 | 1.161010238 |
| SCNN1A    | 0.391075013 | 0.504731324 |
| SECTM1    | 0.653728601 | 1.69305421  |
| SELL      | 2.393821141 | 2.398519752 |
| SERPINA1  | 6.03301742  | 6.742381015 |
| SERPINA3  | 0.451866482 | 1.14123402  |
| SERPINF1  | 0.771540886 | 1.310899836 |
| SERPING1  | 6.450803173 | 6.904775574 |
| SETX      | 0.533562746 | 0.404387136 |
| SFTPA2    | 6.632894404 | 7.572247582 |
| SFTPC     | 5.550137815 | 6.167332106 |
| SFTPD     | 1.031412882 | 2.039757099 |
| SGCA      | 1.011376522 | 1.972634055 |
| SH2B3     | 0.430428339 | 0.798013837 |
| SH3PXD2A  | 0.394771723 | 0.799428101 |
| SIGLEC1   | 2.7333832   | 3.462057884 |

|          |             |             |
|----------|-------------|-------------|
| SIGLEC14 | 6.085682943 | 6.470407551 |
| SIGLEC5  | 5.62951765  | 6.229115893 |
| SIGLEC9  | 5.540169244 | 6.451668255 |
| SIPA1L2  | 0.613950263 | 0.642630212 |
| SIRPB1   | 0.531788488 | 1.003131474 |
| SIRPB2   | 5.376449205 | 6.480222599 |
| SLA      | 5.847279535 | 6.538640331 |
| SLAMF7   | 1.92864025  | 2.044861438 |
| SLAMF8   | 6.114100338 | 6.558524976 |
| SLC11A1  | 1.38569099  | 2.091157323 |
| SLC1A3   | 6.475009802 | 6.312627925 |
| SLC2A14  | 1.231861202 | 1.96731593  |
| SLC2A3   | 0.683301701 | 1.050787854 |
| SLC31A2  | 0.616922201 | 0.83064444  |
| SLC38A5  | 2.077079258 | 2.511151912 |
| SLC43A3  | 6.427784625 | 6.591455296 |
| SLC44A2  | 0.503469568 | 0.497774547 |
| SLC5A3   | 0.77090395  | 0.703128569 |
| SLC6A14  | 2.681654291 | 2.545631441 |
| SLC7A8   | 1.814013979 | 2.602329424 |
| SLCO2A1  | 2.912011401 | 2.853322658 |
| SLCO2B1  | 0.530484336 | 0.807134341 |
| SLED1    | 6.437189104 | 6.372790531 |
| SLFN5    | 0.99365993  | 1.183117932 |
| SMA5     | 0.504024156 | 1.209192324 |
| SMAP2    | 0.463060474 | 0.956396735 |
| SMG1     | 0.428093946 | 0.470244992 |
| SMTNL1   | 5.749202006 | 6.235790964 |
| SNAI2    | 2.594460433 | 2.913336703 |
| SNORA11  | 7.36362514  | 8.859025955 |
| SNORA12  | 7.929626826 | 7.987092188 |
| SNORA13  | 0.47054833  | 1.666733465 |
| SNORA14A | 0.740823747 | 1.665351148 |
| SNORA17  | 0.492625301 | 4.06584467  |
| SNORA18  | 0.561821247 | 1.297745015 |
| SNORA20  | 0.828086601 | 2.060655317 |
| SNORA23  | 1.31863244  | 1.628504626 |
| SNORA24  | 6.65511057  | 8.46218679  |
| SNORA26  | 6.760420975 | 8.18159494  |
| SNORA28  | 7.165383824 | 8.07820661  |
| SNORA31  | 7.194370016 | 8.649786446 |
| SNORA33  | 2.57140929  | 2.086168931 |
| SNORA38B | 7.147110291 | 8.023198941 |
| SNORA4   | 7.53653698  | 7.982706666 |
| SNORA42  | 6.352028075 | 8.831979773 |
| SNORA43  | 1.870107053 | 4.269169046 |
| SNORA46  | 7.260793816 | 8.383829723 |

|             |             |             |
|-------------|-------------|-------------|
| SNORA49     | 6.885870991 | 8.072106457 |
| SNORA51     | 0.469064418 | 2.192009039 |
| SNORA53     | 2.373247054 | 1.880882452 |
| SNORA54     | 0.452945828 | 2.757611483 |
| SNORA58     | 1.408000621 | 2.367284189 |
| SNORA5A     | 1.074037737 | 2.308205698 |
| SNORA60     | 0.670991193 | 2.329864034 |
| SNORA63     | 0.893080199 | 1.777144555 |
| SNORA65     | 0.629598517 | 2.118888997 |
| SNORA66     | 0.96787155  | 2.242057674 |
| SNORA68     | 1.005658348 | 2.783656324 |
| SNORA70     | 7.488803042 | 9.429574651 |
| SNORA71A    | 1.317881313 | 1.664258683 |
| SNORA71D    | 6.069316524 | 8.469411082 |
| SNORA72     | 7.006932177 | 7.904693911 |
| SNORA74A    | 1.672997896 | 2.301827412 |
| SNORA74B    | 6.935054598 | 8.286036344 |
| SNORA77     | 6.70588423  | 8.544975392 |
| SNORA7A     | 1.33488386  | 4.062278145 |
| SNORA8      | 0.950366471 | 2.561761246 |
| SNORA80B    | 6.099352552 | 8.349341647 |
| SNORA81     | 0.641508425 | 1.836676523 |
| SNORA9      | 7.281562838 | 8.518465244 |
| SNORD116-15 | 7.88417207  | 7.717538198 |
| SNORD116-16 | 7.039072895 | 8.034339633 |
| SNORD116-17 | 7.164013617 | 8.026439287 |
| SNORD12     | 0.973860032 | 1.13926754  |
| SNORD15A    | 1.398555997 | 2.531494672 |
| SNORD15B    | 0.525429177 | 2.552262228 |
| SNORD17     | 0.54000487  | 1.902168595 |
| SNORD21     | 7.225851811 | 8.669235036 |
| SNORD67     | 6.560291696 | 8.495832846 |
| SNORD8      | 7.032715439 | 8.308171557 |
| SNORD89     | 1.41697146  | 2.242996563 |
| SNORD94     | 0.811098394 | 1.569136225 |
| SNORD97     | 1.238811579 | 1.630110398 |
| SNTB2       | 0.415977903 | 0.45835767  |
| SNX10       | 0.934453715 | 0.928768027 |
| SOD2        | 1.32222828  | 1.208645837 |
| SOD3        | 6.248493127 | 6.348326285 |
| SORL1       | 0.432620028 | 0.631916974 |
| SOX7        | 1.682804055 | 1.974659448 |
| SP100       | 0.849839913 | 0.673226377 |
| SP110       | 1.009977721 | 1.019162998 |
| SPARC       | 1.949685081 | 1.864346035 |
| SPARCL1     | 6.368523032 | 6.561067975 |
| SPDYE2      | 0.633752895 | 1.543006171 |

|          |             |             |
|----------|-------------|-------------|
| SPDYE2L  | 0.677896294 | 1.577578831 |
| SPDYE6   | 0.776357192 | 1.648250139 |
| SPDYE7P  | 1.301199123 | 1.987635558 |
| SPOCK2   | 0.806810203 | 1.627776944 |
| SPON1    | 2.069564252 | 2.433207755 |
| SPON2    | 5.669879146 | 6.158516277 |
| SPRY1    | 1.620696068 | 1.013313036 |
| SPRY4    | 0.376216368 | 0.54747277  |
| SRGN     | 1.032940813 | 0.652467991 |
| SSH2     | 0.590767156 | 0.931156825 |
| ST5      | 0.756168073 | 0.848295594 |
| ST6GAL1  | 0.601284721 | 0.694931808 |
| STAB1    | 2.355329488 | 3.24233443  |
| STAU2    | 0.495783462 | 0.476077619 |
| STEAP4   | 5.945101101 | 6.059631567 |
| STON1    | 5.756779075 | 6.056085014 |
| STX12    | 0.720721452 | 0.520883139 |
| STX7     | 0.588380553 | 0.687053401 |
| SVEP1    | 1.273386238 | 1.307665478 |
| TACSTD2  | 5.932861717 | 6.044833633 |
| TAGLN    | 0.477208358 | 0.971447077 |
| TBXAS1   | 0.414410849 | 0.514593853 |
| TCF21    | 1.078904711 | 1.804539535 |
| TEAD3    | 0.4874542   | 0.446732098 |
| TEK      | 6.027296592 | 6.18772372  |
| THBS1    | 0.660122634 | 0.456660535 |
| THNSL2   | 5.96266855  | 6.043016277 |
| TIE1     | 5.357700493 | 6.110872415 |
| TIMP1    | 0.453180257 | 0.439567554 |
| TIMP3    | 2.293482824 | 2.381893778 |
| TJP2     | 0.806160391 | 0.8008014   |
| TLR2     | 2.794221394 | 2.932149115 |
| TLR4     | 5.838592844 | 6.081854768 |
| TMEM100  | 5.891485049 | 6.266997976 |
| TMEM106A | 0.669510415 | 1.261350892 |
| TMEM125  | 5.40424514  | 6.257424162 |
| TMEM173  | 0.662137916 | 1.287556535 |
| TMEM204  | 1.42952598  | 1.984250666 |
| TMEM63A  | 0.445074611 | 0.760420946 |
| TMPPE    | 0.489692199 | 0.796215661 |
| TNC      | 1.635347186 | 1.788023073 |
| TNFAIP3  | 1.200465193 | 1.521006224 |
| TNFRSF14 | 2.25965651  | 2.960316948 |
| TNFRSF1B | 1.742155188 | 2.144205336 |
| TNFRSF6B | 0.494921617 | 1.767775185 |
| TNFSF10  | 6.604609403 | 6.4366587   |
| TNS1     | 0.952173299 | 1.321016847 |

|          |             |             |
|----------|-------------|-------------|
| TRAF1    | 0.84159761  | 1.354386815 |
| TRANK1   | 1.012792012 | 1.33422052  |
| TREM1    | 5.95695128  | 6.102080226 |
| TRIB2    | 1.750060289 | 2.167475924 |
| TRIM38   | 0.428601165 | 0.834828948 |
| TRPV2    | 1.148784204 | 1.562334985 |
| TSSK4    | 5.593169723 | 6.558733764 |
| TSTD1    | 2.445130821 | 2.252907512 |
| TULP2    | 5.987294811 | 6.034796848 |
| TXNIP    | 2.393476153 | 2.582999382 |
| TYROBP   | 7.142821043 | 7.319464179 |
| UBA7     | 1.882282782 | 2.290376761 |
| UBE2L6   | 0.567834654 | 1.01894821  |
| UBR2     | 0.62118347  | 0.580059244 |
| UHMK1    | 0.532536338 | 0.405554612 |
| USP18    | 0.652031187 | 0.495855461 |
| UTRN     | 0.728595491 | 0.511482608 |
| VAMP5    | 1.420030619 | 2.344719311 |
| VCAN     | 0.478562562 | 0.523880989 |
| VNN2     | 6.45753826  | 6.303660353 |
| VPS13D   | 0.466923728 | 0.727053473 |
| VTRNA1-1 | 7.030356805 | 9.515546676 |
| VTRNA2-1 | 6.367396925 | 9.96052738  |
| VWF      | 3.40739732  | 3.810644421 |
| WASH5P   | 0.50526923  | 1.242537853 |
| WDFY3    | 0.695815893 | 0.753021331 |
| WFDC10B  | 5.483588723 | 6.319636886 |
| WISP1    | 6.219880416 | 6.248184228 |
| WLS      | 1.130011629 | 0.809005017 |
| XAF1     | 6.465772352 | 6.308918534 |
| ZBTB16   | 5.395268716 | 6.522163743 |
| ZEB2     | 1.638647345 | 1.756531352 |
| ZFP106   | 0.45181762  | 0.584450056 |
| ZKSCAN1  | 0.525751101 | 0.472837106 |
| ZNF397   | 0.975677992 | 1.181320235 |



**Supplementary Table 4: Differentially expressed host genes in 1918 autopsy vs. 2009 autopsy samples**

| gene_id  | 1918 (RPKM) | 2009 (RPKM) | Fold Change<br>(1918/2009) | Log10<br>(Fold-change) | p_value     |
|----------|-------------|-------------|----------------------------|------------------------|-------------|
| ABCA3    | 27.1325     | 3.11425     | 8.712370555                | 0.940136339            | 0.000483919 |
| ABCG2    | 0.0738977   | 2.99729     | 0.024654838                | -1.608097843           | 0.000497477 |
| ABHD14B  | 13.1758     | 0.811552    | 16.23531209                | 1.210460642            | 0.000763471 |
| ACTA1    | 30.5245     | 0.0162347   | 1880.201051                | 3.274204291            | 3.49E-11    |
| ADCK4    | 12.4568     | 0.536011    | 23.23982157                | 1.366232789            | 0.000901994 |
| ADCY6    | 12.3579     | 1.83541     | 6.733046022                | 0.828211583            | 0.00274154  |
| AGPAT3   | 12.4816     | 1.41994     | 8.790230573                | 0.944000267            | 0.00208505  |
| AGRN     | 14.651      | 1.40335     | 10.44001853                | 1.018701269            | 0.000616993 |
| AHI1     | 0           | 16.5886     | 0                          | #NUM!                  | 0.00070616  |
| AKAP17A  | 0           | 32.1597     | 0                          | #NUM!                  | 0.000336417 |
| AKAP5    | 0.0656316   | 2.2863      | 0.028706469                | -1.542020225           | 0.000805263 |
| AKNA     | 18.7317     | 2.35425     | 7.956546671                | 0.900724615            | 0.00113032  |
| AKT2     | 14.8776     | 1.48081     | 10.04693377                | 1.002033539            | 0.00157653  |
| ALCAM    | 0           | 12.5784     | 0                          | #NUM!                  | 0.000943819 |
| ALDOA    | 140.987     | 22.4255     | 6.286905532                | 0.798436935            | 0.000255182 |
| ALG13    | 0           | 16.2152     | 0                          | #NUM!                  | 0.00101439  |
| ALPL     | 66.8172     | 10.7797     | 6.198428528                | 0.792281598            | 0.0011753   |
| AMDHD2   | 17.2487     | 0.4693      | 36.75410185                | 1.565305815            | 0.000414644 |
| AMZ2P1   | 0.0321529   | 4.26189     | 0.007544282                | -2.122382087           | 1.08E-05    |
| ANGPTL4  | 49.1863     | 4.62023     | 10.64585529                | 1.027180559            | 0.00071757  |
| ANKRD19P | 16.3991     | 0.163895    | 100.0585741                | 2.00025431             | 6.20E-06    |
| ANO6     | 0           | 19.5443     | 0                          | #NUM!                  | 0.000364387 |
| APOBR    | 24.179      | 2.23997     | 10.794341                  | 1.033196133            | 0.000836795 |
| APP      | 0           | 39.4695     | 0                          | #NUM!                  | 0.00237222  |
| AQP7P1   | 10.7745     | 0.322732    | 33.38528562                | 1.523555096            | 0.000243371 |
| AREG     | 0.50297     | 30.6165     | 0.01642807                 | -1.78441346            | 9.04E-08    |
| ARGFXP2  | 25.6457     | 0.857963    | 29.89138226                | 1.475545999            | 0.000517402 |
| ARHGDI1  | 55.9901     | 6.53184     | 8.57187255                 | 0.933075705            | 0.00182929  |
| ARHGEF17 | 15.0547     | 2.16082     | 6.967123592                | 0.843053515            | 0.00259793  |
| ARL16    | 14.3381     | 0.542442    | 26.43250338                | 1.422138296            | 0.00181409  |
| ASAH2B   | 11.4        | 0.147338    | 77.37311488                | 1.888590081            | 0.000350994 |
| ASGR2    | 15.2964     | 0.146776    | 104.2159481                | 2.017934184            | 0.000146282 |
| ATAD5    | 0.379416    | 10.7413     | 0.035323099                | -1.451941205           | 0.000318675 |
| ATP2C1   | 0           | 18.1792     | 0                          | #NUM!                  | 9.03E-05    |
| ATP6VOC  | 78.6176     | 5.66888     | 13.86827733                | 1.142022518            | 0.000414725 |
| B3GAT3   | 35.7709     | 0.712822    | 50.18209315                | 1.700548772            | 2.14E-05    |
| BCAM     | 39.2631     | 2.0794      | 18.8819371                 | 1.276046547            | 0.000113239 |
| BCL2L11  | 0           | 5.484       | 0                          | #NUM!                  | 0.00164186  |
| BIN1     | 12.9928     | 0.971996    | 13.3671332                 | 1.126038276            | 0.00223262  |
| BLVRB    | 30.1272     | 1.47902     | 20.36970426                | 1.308984724            | 0.0023048   |
| BOD1     | 16.3627     | 0.0954408   | 171.4434498                | 2.234120897            | 3.95E-06    |
| BRI3     | 146.659     | 11.5955     | 12.64792376                | 1.102019239            | 0.000712293 |
| BTBD19   | 29.0546     | 0.687732    | 42.24697993                | 1.625795668            | 7.35E-05    |

|           |          |           |             |              |             |
|-----------|----------|-----------|-------------|--------------|-------------|
| C10orf128 | 28.8346  | 0.237199  | 121.5629071 | 2.084801077  | 0.000135566 |
| C10orf54  | 23.906   | 2.69969   | 8.85509077  | 0.947193017  | 0.00106423  |
| C11orf84  | 10.8397  | 0.273535  | 39.62820114 | 1.598004359  | 0.000386283 |
| C14orf1   | 13.3173  | 0.500797  | 26.59221201 | 1.424754465  | 0.00131694  |
| C15orf39  | 23.1519  | 2.57013   | 9.00806574  | 0.954631547  | 0.00125187  |
| C15orf58  | 18.1392  | 0.0182362 | 994.6809094 | 2.997683783  | 3.99E-09    |
| C16orf5   | 13.6366  | 0.372321  | 36.62592226 | 1.563788569  | 7.29E-05    |
| C16orf53  | 21.367   | 1.96588   | 10.86892384 | 1.036186546  | 0.00106033  |
| C19orf23  | 13.0036  | 0.0363137 | 358.0907481 | 2.5539931    | 8.33E-07    |
| C19orf24  | 10.5297  | 0.212304  | 49.5972756  | 1.695457821  | 0.00077806  |
| C19orf25  | 11.8749  | 0.0712273 | 166.718379  | 2.221983479  | 2.26E-06    |
| C19orf71  | 15.5651  | 0.359854  | 43.25393076 | 1.636025581  | 0.00116509  |
| C19orf79  | 84.0378  | 0.156994  | 535.2930685 | 2.72859162   | 2.08E-07    |
| C1orf54   | 3.21057  | 70.0084   | 0.045859783 | -1.338568009 | 0.00183188  |
| C22orf45  | 20.5368  | 0.115576  | 177.6908701 | 2.249665114  | 9.27E-07    |
| C2orf3    | 0.216448 | 10.2967   | 0.021021104 | -1.677344482 | 0.000360383 |
| C9orf23   | 14.2682  | 0.357263  | 39.93752502 | 1.601381148  | 0.000347116 |
| CADM4     | 11.1893  | 0.15891   | 70.41281228 | 1.84765169   | 5.20E-05    |
| CCDC124   | 10.4696  | 0.272779  | 38.38125369 | 1.584119156  | 0.00125995  |
| CCNT2     | 0        | 14.9475   | 0           | #NUM!        | 0.000548025 |
| CD74      | 439.013  | 45.0418   | 9.746790759 | 0.988861643  | 3.42E-06    |
| CD97      | 39.6837  | 7.7882    | 5.095362215 | 0.707175062  | 0.000786628 |
| CDCA8     | 0.843006 | 18.1325   | 0.046491438 | -1.33262702  | 0.00122603  |
| CDH19     | 0.523854 | 17.6014   | 0.029762064 | -1.526336948 | 0.0002288   |
| CDH23     | 24.817   | 3.45569   | 7.18148908  | 0.856214504  | 0.000562466 |
| CDK10     | 42.7284  | 2.12407   | 20.11628619 | 1.303547806  | 7.60E-05    |
| CEBPB     | 45.7667  | 5.01672   | 9.122833246 | 0.960129737  | 0.00210817  |
| CEBPD     | 38.0663  | 1.55872   | 24.42151252 | 1.387772558  | 0.000387815 |
| CELF2     | 0        | 7.54195   | 0           | #NUM!        | 0.00119001  |
| CENPE     | 0.322029 | 7.57345   | 0.04252078  | -1.371398779 | 0.000579382 |
| CFL1      | 140.204  | 18.2434   | 7.685190261 | 0.885654624  | 0.0011428   |
| CHCHD10   | 22.3774  | 0.395453  | 56.58674988 | 1.75271475   | 0.000334974 |
| CHID1     | 15.6558  | 1.10361   | 14.18598962 | 1.151859638  | 0.000725575 |
| CIITA     | 21.7714  | 1.27575   | 17.06556927 | 1.23212078   | 0.000115731 |
| CLCN7     | 16.9916  | 1.37563   | 12.35186787 | 1.091732637  | 0.000651241 |
| CLDN4     | 21.5973  | 1.2005    | 17.99025406 | 1.255037297  | 0.00124349  |
| CLDN5     | 35.9607  | 1.651     | 21.78116293 | 1.338081064  | 0.000315606 |
| CLDND2    | 26.1939  | 1.14256   | 22.92562316 | 1.360321149  | 0.00161957  |
| CLEC2D    | 1.97189  | 22.2185   | 0.088749916 | -1.051832051 | 0.000282245 |
| CLINT1    | 0        | 10.9794   | 0           | #NUM!        | 0.0015507   |
| COASY     | 30.5687  | 4.12009   | 7.419425304 | 0.870370267  | 0.00124929  |
| COBRA1    | 14.2788  | 0.990337  | 14.41812232 | 1.158908706  | 0.00246905  |
| COMMD5    | 23.6903  | 1.80413   | 13.13114909 | 1.118302732  | 0.00142568  |
| CSDE1     | 0        | 21.2175   | 0           | #NUM!        | 0.000999296 |
| CSF1      | 54.8893  | 7.97278   | 6.884587308 | 0.837877912  | 0.000144649 |
| CSF3      | 0        | 26.8262   | 0           | #NUM!        | 0.000522447 |
| CSF3R     | 58.4966  | 6.29714   | 9.289391692 | 0.967987276  | 8.39E-05    |

|              |           |          |             |              |             |
|--------------|-----------|----------|-------------|--------------|-------------|
| CSK          | 18.7579   | 0.780142 | 24.04421246 | 1.381010557  | 0.000205949 |
| CTSC         | 0         | 40.0751  | 0           | #NUM!        | 0.000770717 |
| CTSD         | 128.757   | 12.9339  | 9.955001972 | 0.99804135   | 0.000144793 |
| CTSG         | 0.433133  | 44.0601  | 0.009830504 | -2.007424205 | 8.05E-06    |
| CTU2         | 11.6172   | 0.257718 | 45.07717738 | 1.653956714  | 0.000323209 |
| CYBA         | 53.8574   | 3.03735  | 17.73170692 | 1.248750544  | 0.00215593  |
| CYP26B1      | 0.0722405 | 2.38455  | 0.030295234 | -1.51862569  | 0.00112598  |
| DAB2IP       | 13.922    | 1.31508  | 10.5864282  | 1.024749456  | 0.00152104  |
| DCTN1        | 0         | 8.79851  | 0           | #NUM!        | 0.00254311  |
| DDHD2        | 2.54243   | 18.9694  | 0.134027961 | -0.87280459  | 0.00222999  |
| DDIT4        | 73.0716   | 9.11385  | 8.017643477 | 0.90404674   | 0.00148769  |
| DDTL         | 46.3199   | 1.70226  | 27.21082561 | 1.434741719  | 7.33E-05    |
| DEDD2        | 21.8279   | 0.670507 | 32.55432083 | 1.512608639  | 0.000195867 |
| DEFA1        | 33.0244   | 1233.21  | 0.026779218 | -1.572202102 | 1.48E-05    |
| DEFA1B       | 64.2417   | 1233.21  | 0.052093074 | -1.283220013 | 1.19E-05    |
| DENND2D      | 25.1414   | 2.18261  | 11.51896124 | 1.061413317  | 0.00258049  |
| DEXI         | 44.8019   | 1.24943  | 35.85787119 | 1.554584503  | 4.45E-05    |
| DGKZ         | 16.7888   | 1.06953  | 15.69736239 | 1.195826685  | 0.000142033 |
| DHRS4L2      | 15.5115   | 0.262192 | 59.16084396 | 1.772034361  | 0.000108927 |
| DKFZp761E198 | 20.0829   | 1.57634  | 12.74020833 | 1.10517653   | 0.000478989 |
| DNAJB1       | 274.522   | 11.6961  | 23.47124255 | 1.370536081  | 2.19E-07    |
| DNAJB5       | 11.425    | 0.794988 | 14.37128611 | 1.157495636  | 0.00135059  |
| DPM2         | 13.1028   | 0.389494 | 33.64056956 | 1.52686334   | 0.000704884 |
| DPP7         | 15.1697   | 0.739753 | 20.50643931 | 1.311890257  | 0.00198435  |
| DTHD1        | 0         | 7.81702  | 0           | #NUM!        | 0.0021458   |
| DTNA         | 0         | 10.7231  | 0           | #NUM!        | 0.000774751 |
| DTX2         | 18.2745   | 1.23043  | 14.85212487 | 1.171788592  | 0.00124838  |
| EAF2         | 0.254843  | 18.0161  | 0.014145292 | -1.849388075 | 0.000121791 |
| ECI1         | 20.9742   | 0.79107  | 26.51370928 | 1.42347049   | 0.00175281  |
| EIF2C2       | 13.6604   | 0.928192 | 14.71721368 | 1.167825595  | 0.000693955 |
| EIF4G1       | 0         | 10.2336  | 0           | #NUM!        | 0.000560895 |
| EPN1         | 25.0794   | 0.886278 | 28.29744166 | 1.451747173  | 5.21E-07    |
| ERBB2        | 10.7657   | 0.774425 | 13.90153985 | 1.143062909  | 0.00138397  |
| ERCC4        | 0.513498  | 7.82535  | 0.065619813 | -1.182965015 | 0.0025499   |
| ERVFRD-1     | 11.1833   | 0.538798 | 20.75601617 | 1.317144     | 0.000836283 |
| ESRRA        | 28.0721   | 1.34644  | 20.84912807 | 1.319087897  | 0.000264386 |
| ETHE1        | 18.4914   | 0.303598 | 60.90751586 | 1.784670887  | 0.000179042 |
| ETV7         | 21.305    | 1.91702  | 11.11360341 | 1.045854895  | 0.00201307  |
| EXOC6B       | 2.87459   | 35.5659  | 0.080824329 | -1.092457893 | 0.00289636  |
| EXOSC4       | 11.7331   | 0.242633 | 48.35739574 | 1.684462904  | 0.000770196 |
| EXOSC6       | 17.0522   | 0.852314 | 20.0069458  | 1.301180796  | 0.00160279  |
| F2RL1        | 0.37833   | 11.1464  | 0.033941901 | -1.469263844 | 0.00061827  |
| FAM100B      | 35.7602   | 1.11702  | 32.01392992 | 1.50533899   | 9.93E-05    |
| FAM109B      | 11.1522   | 0.530072 | 21.03902866 | 1.323025685  | 0.00157224  |
| FAM157A      | 45.1138   | 0.781374 | 57.73650006 | 1.761450454  | 1.61E-05    |
| FAM157B      | 93.2796   | 1.92848  | 48.36949307 | 1.684571536  | 2.85E-06    |
| FAM165B      | 0.47293   | 18.2167  | 0.025961343 | -1.585672842 | 0.000626112 |

|          |          |            |             |              |             |
|----------|----------|------------|-------------|--------------|-------------|
| FAM167B  | 12.8568  | 0.0557158  | 230.7568051 | 2.363154517  | 8.37E-06    |
| FAM195B  | 22.6277  | 1.62185    | 13.95178346 | 1.144629727  | 0.00252596  |
| FAM208A  | 0        | 10.1156    | 0           | #NUM!        | 0.00138009  |
| FAM20C   | 16.8798  | 0.721529   | 23.39448588 | 1.369113505  | 0.00037137  |
| FAM22A   | 12.4707  | 0.0389273  | 320.35872   | 2.50563655   | 6.97E-08    |
| FAM22D   | 15.4305  | 1.5469     | 9.975111513 | 0.998917759  | 0.00124888  |
| FAM22G   | 10.5184  | 0.255032   | 41.2434518  | 1.615355006  | 4.98E-05    |
| FAM65B   | 28.2775  | 2.13781    | 13.22732142 | 1.121471907  | 3.88E-05    |
| FAM82A2  | 16.6271  | 1.10216    | 15.08592219 | 1.178571863  | 0.00214354  |
| FASN     | 19.8714  | 1.98431    | 10.01426188 | 1.000618945  | 0.000273234 |
| FBXO34   | 27.1368  | 2.93325    | 9.251444643 | 0.966209555  | 0.00225997  |
| FBXW4    | 20.2413  | 1.46693    | 13.79840892 | 1.139829011  | 0.00196561  |
| FCGR1C   | 19.3559  | 0.276688   | 69.95569016 | 1.844823046  | 5.37E-05    |
| FDPSL2A  | 15.441   | 1.45792    | 10.59111611 | 1.024941729  | 0.0012904   |
| FEM1A    | 13.1575  | 0.854502   | 15.39785747 | 1.187460295  | 0.00100516  |
| FES      | 19.369   | 2.25605    | 8.585359367 | 0.933758479  | 0.00226588  |
| FLJ39051 | 22.7492  | 0.382921   | 59.40964324 | 1.773856944  | 0.00023397  |
| FLJ45445 | 39.0099  | 3.30455    | 11.80490536 | 1.07206251   | 9.99E-05    |
| FLNA     | 0        | 10.4944    | 0           | #NUM!        | 0.000477574 |
| FN3K     | 16.761   | 0.561533   | 29.84864647 | 1.474924642  | 0.000759498 |
| FOXF2    | 10.9919  | 0.136957   | 80.25803719 | 1.904488534  | 3.44E-05    |
| FOXI2    | 17.3862  | 0.00702064 | 2476.440894 | 3.393827967  | 3.57E-12    |
| FOXK1    | 12.6255  | 1.78742    | 7.063532913 | 0.849021973  | 0.0018412   |
| FSTL3    | 87.5787  | 7.63202    | 11.47516647 | 1.059758995  | 9.25E-05    |
| FTL      | 3259.8   | 178.562    | 18.25584391 | 1.261401914  | 3.50E-06    |
| GADD45G  | 17.5121  | 0.0729522  | 240.0489636 | 2.380299835  | 1.71E-06    |
| GALNT10  | 14.0326  | 1.72358    | 8.141542603 | 0.9107067    | 0.00268431  |
| GAPDH    | 465.564  | 65.103     | 7.151191189 | 0.854378389  | 0.000803241 |
| GIGYF1   | 16.1002  | 1.41046    | 11.41485756 | 1.057470497  | 0.000502565 |
| GIGYF2   | 0        | 9.66288    | 0           | #NUM!        | 0.00296802  |
| GLUL     | 125.094  | 21.5303    | 5.810137341 | 0.764186398  | 6.73E-05    |
| GNLY     | 27.5642  | 2.01391    | 13.68690756 | 1.136305334  | 0.0027843   |
| GNPDA2   | 0.060718 | 3.4137     | 0.017786566 | -1.749907894 | 0.000479633 |
| GNPTG    | 14.3883  | 0.604337   | 23.80840491 | 1.3767303    | 0.00225282  |
| GPC1     | 12.9769  | 0.569562   | 22.78399893 | 1.357629952  | 0.000357787 |
| GPN2     | 12.5872  | 0.304196   | 41.37858486 | 1.616775634  | 0.00043382  |
| GPR124   | 10.6632  | 0.748094   | 14.25382372 | 1.153931383  | 0.000691226 |
| GPR22    | 0.376913 | 7.66602    | 0.049166712 | -1.308328831 | 0.00235791  |
| GPSM1    | 15.1949  | 0.661717   | 22.96283759 | 1.361025554  | 7.70E-05    |
| GPX4     | 50.3562  | 3.703      | 13.59875776 | 1.133499238  | 0.00157044  |
| GRAMD1A  | 32.6191  | 3.40062    | 9.592103793 | 0.981913869  | 0.000612565 |
| GRAP2    | 0.308746 | 26.7242    | 0.011553049 | -1.937303374 | 1.40E-05    |
| GRINA    | 82.8669  | 9.03229    | 9.174517204 | 0.962583219  | 0.000418561 |
| GSK3A    | 24.6635  | 1.51264    | 16.30493706 | 1.212319127  | 0.00081492  |
| GUK1     | 63.7703  | 4.23751    | 15.04900283 | 1.177507724  | 0.00021028  |
| H2AFX    | 14.5476  | 0.481642   | 30.20417655 | 1.480067     | 0.00076007  |
| H3F3C    | 62.3131  | 5.74385    | 10.84866422 | 1.035376268  | 0.00235196  |

|           |          |           |             |              |             |
|-----------|----------|-----------|-------------|--------------|-------------|
| HAGH      | 14.9705  | 0.510762  | 29.31012879 | 1.467017727  | 0.000780883 |
| HBB       | 29.3958  | 323.485   | 0.09087222  | -1.041568863 | 0.00257017  |
| HBS1L     | 0        | 7.86702   | 0           | #NUM!        | 0.000957596 |
| HECTD2    | 0.203457 | 5.7708    | 0.03525629  | -1.452763387 | 0.000569453 |
| HEMK1     | 13.2533  | 1.13619   | 11.66468636 | 1.066873066  | 0.000886308 |
| HIST1H3I  | 42.7315  | 0.696092  | 61.38771886 | 1.788081496  | 0.000234205 |
| HIST2H2BC | 116.274  | 3.84104   | 30.27148897 | 1.481033783  | 0.000161356 |
| HIST4H4   | 20.3889  | 0.101893  | 200.1010864 | 2.301249447  | 2.97E-05    |
| HIVEP3    | 0        | 22.5369   | 0           | #NUM!        | 0.000857881 |
| HMGB1     | 11.4699  | 129.933   | 0.088275496 | -1.054159834 | 0.000732256 |
| HMHA1     | 15.7719  | 1.311     | 12.03043478 | 1.080281323  | 0.00113094  |
| HP        | 239.555  | 15.8197   | 15.14282825 | 1.180206996  | 2.28E-07    |
| HPCAL1    | 31.369   | 2.92497   | 10.72455444 | 1.030379258  | 0.00138786  |
| HPR       | 159.128  | 4.82769   | 32.9615199  | 1.518007229  | 1.69E-06    |
| HSP90AB3P | 89.6652  | 13.9355   | 6.434300886 | 0.808501366  | 0.00272835  |
| HSPA2     | 13.2272  | 0.398937  | 33.15611237 | 1.520563603  | 0.000220968 |
| HSPA6     | 111.566  | 5.37041   | 20.77420532 | 1.31752442   | 2.14E-06    |
| HSPA7     | 108.719  | 2.38611   | 45.56328082 | 1.658614988  | 9.56E-08    |
| HSPB1     | 290.083  | 7.49981   | 38.67871319 | 1.587472017  | 4.32E-07    |
| IDS       | 0        | 8.39519   | 0           | #NUM!        | 0.00201975  |
| IFITM1    | 397.559  | 65.6822   | 6.052766198 | 0.781953899  | 0.00259651  |
| IFITM2    | 614.011  | 69.5153   | 8.832746172 | 0.94609575   | 0.000228425 |
| IFITM3    | 1270.17  | 124.726   | 10.18368263 | 1.007904856  | 8.28E-05    |
| IFT27     | 11.0737  | 0.147222  | 75.21769844 | 1.87632004   | 0.000135985 |
| IKKB      | 0        | 8.7638    | 0           | #NUM!        | 0.00162339  |
| IL17RA    | 24.8198  | 2.72685   | 9.102004144 | 0.959137029  | 0.000296954 |
| IL1RAP    | 0        | 10.7622   | 0           | #NUM!        | 0.00275265  |
| IL27RA    | 11.829   | 0.0683653 | 173.0263745 | 2.238112308  | 7.58E-07    |
| IL32      | 578.914  | 66.3268   | 8.728206396 | 0.940925007  | 1.27E-07    |
| ILF3      | 0        | 17.6605   | 0           | #NUM!        | 0.000831219 |
| IMPA1     | 0        | 7.71312   | 0           | #NUM!        | 0.00305686  |
| IMPDH1    | 24.0425  | 1.92792   | 12.4706938  | 1.095890616  | 0.00101041  |
| INO80E    | 28.5203  | 0.988968  | 28.83844573 | 1.45997185   | 0.00048929  |
| INTS3     | 22.83    | 1.87352   | 12.18561851 | 1.085847578  | 0.000403119 |
| IQSEC2    | 17.0263  | 0.557353  | 30.54850337 | 1.484989938  | 0.00013662  |
| IRAK1     | 30.2154  | 4.21145   | 7.174583576 | 0.855796699  | 0.00144238  |
| IRF7      | 34.5693  | 4.59704   | 7.519904112 | 0.876212303  | 0.00150607  |
| JAK3      | 30.055   | 4.17451   | 7.199647384 | 0.857311227  | 0.00142485  |
| JOSD2     | 11.2171  | 0.334198  | 33.56423438 | 1.525876745  | 0.00243546  |
| JUNB      | 42.9947  | 3.81166   | 11.27978361 | 1.052300768  | 0.00118722  |
| KCNE1     | 19.1968  | 0.59614   | 32.20183178 | 1.507880577  | 2.82E-05    |
| KDM6B     | 21.9986  | 3.30656   | 6.653017033 | 0.823018635  | 0.00232887  |
| KIAA0895L | 15.7501  | 1.24117   | 12.68972018 | 1.103452046  | 0.00161537  |
| KIF14     | 0.220845 | 4.88825   | 0.045178745 | -1.345065838 | 0.00122852  |
| KIF20B    | 0.272866 | 7.34765   | 0.037136499 | -1.430199036 | 0.000535433 |
| KIF27     | 1.06535  | 14.6364   | 0.072787707 | -1.13794196  | 0.00275601  |
| KRT6A     | 19.4476  | 0.502181  | 38.72627598 | 1.588005736  | 7.57E-05    |

|              |           |           |             |              |             |
|--------------|-----------|-----------|-------------|--------------|-------------|
| LAP3         | 68.0136   | 10.5015   | 6.476560491 | 0.811344426  | 0.00300008  |
| LENG1        | 16.4118   | 0.245128  | 66.95195979 | 1.825763294  | 0.000203951 |
| LGALS9C      | 25.6428   | 0.984168  | 26.05530763 | 1.415896205  | 0.000337566 |
| LINC00273    | 89.0191   | 0.0251346 | 3541.695511 | 3.549211221  | 4.66E-15    |
| LINC00324    | 124.289   | 0.342688  | 362.6885097 | 2.559533797  | 7.93E-11    |
| LMF2         | 14.0387   | 0.959231  | 14.63536937 | 1.165403688  | 0.0023822   |
| LOC100127888 | 24.4423   | 0.820946  | 29.77333467 | 1.473827479  | 0.00039568  |
| LOC100130357 | 11.1468   | 0.228677  | 48.74473603 | 1.687927723  | 0.000144366 |
| LOC100130522 | 20.8988   | 0.140078  | 149.1940205 | 2.173751417  | 5.50E-05    |
| LOC100133161 | 42.7423   | 3.71609   | 11.50195501 | 1.060771665  | 0.000105336 |
| LOC100133331 | 101.827   | 14.8336   | 6.864618164 | 0.836616385  | 1.83E-07    |
| LOC100505761 | 21.7105   | 0.0379318 | 572.3561761 | 2.757666373  | 6.70E-08    |
| LOC149837    | 11.2351   | 0.154093  | 72.91116404 | 1.862794032  | 1.42E-05    |
| LOC162632    | 12.8304   | 0.0696391 | 184.2413242 | 2.265387046  | 2.96E-07    |
| LOC284454    | 17.4749   | 1.07963   | 16.18600817 | 1.209139755  | 0.0025374   |
| LOC285758    | 0.163549  | 6.00417   | 0.027239235 | -1.564805087 | 0.000590072 |
| LOC388692    | 11.6712   | 1.35757   | 8.597125747 | 0.934353279  | 0.000737703 |
| LOC643837    | 1.08787   | 24.2029   | 0.044947919 | -1.347290406 | 0.00127577  |
| LOC644936    | 142.533   | 0.10662   | 1336.831739 | 3.126076748  | 8.92E-13    |
| LOC644961    | 14.9885   | 0.870185  | 17.22449824 | 1.236146579  | 0.00128105  |
| LOC648740    | 18.67     | 1.12169   | 16.64452745 | 1.22127147   | 0.00170405  |
| LOC731275    | 60.4705   | 8.02991   | 7.530657255 | 0.876832882  | 0.000775785 |
| LPCAT1       | 29.8551   | 3.77103   | 7.916961679 | 0.898558543  | 0.00160073  |
| LRR19        | 0.0219561 | 3.54482   | 0.006193855 | -2.208038987 | 0.000586807 |
| LRR40        | 0.0759598 | 3.18439   | 0.023853799 | -1.622442439 | 0.000973897 |
| LSM7         | 31.8293   | 0.133413  | 238.5772001 | 2.377628938  | 7.04E-06    |
| LSP1         | 36.7696   | 4.92644   | 7.463726342 | 0.872955708  | 0.00109877  |
| LY6E         | 133.757   | 13.1262   | 10.19007786 | 1.008177502  | 0.000330465 |
| LYG1         | 12.0371   | 0.186534  | 64.53032691 | 1.809763865  | 0.000273321 |
| LZTS2        | 22.5031   | 2.10513   | 10.68964862 | 1.02896343   | 0.00196015  |
| MAFB         | 22.4318   | 2.53368   | 8.85344637  | 0.947112361  | 0.00260713  |
| MAP3K11      | 15.7606   | 0.929503  | 16.95594312 | 1.229321951  | 0.000588591 |
| MARCH1       | 1.54636   | 26.9672   | 0.057342253 | -1.241525249 | 0.000631839 |
| MAST3        | 14.0208   | 0.580181  | 24.16625157 | 1.383209292  | 6.08E-05    |
| MAZ          | 32.1257   | 3.42169   | 9.388840018 | 0.972611939  | 0.000993618 |
| MBOAT7       | 40.6357   | 4.37558   | 9.286928819 | 0.967872117  | 7.11E-05    |
| MBTPS2       | 0.0722906 | 2.84509   | 0.025408897 | -1.59501418  | 0.000562329 |
| MED11        | 17.9289   | 0.301457  | 59.47415386 | 1.774328272  | 0.00027118  |
| MED9         | 14.0291   | 0.351972  | 39.8585683  | 1.600521695  | 0.000185085 |
| METTTL23     | 27.939    | 0.200068  | 139.6475198 | 2.145033227  | 2.24E-08    |
| METTTL5      | 4.29676   | 89.0293   | 0.048262314 | -1.316391862 | 0.000830225 |
| MGAT1        | 59.8923   | 5.63813   | 10.6227242  | 1.026235906  | 1.82E-06    |
| MICAL1       | 18.9604   | 2.285     | 8.297768053 | 0.918961291  | 0.00252759  |
| MICALL2      | 15.6428   | 1.1612    | 13.47123665 | 1.129407466  | 0.00168921  |
| MIF          | 105.042   | 5.867     | 17.9038691  | 1.252946894  | 0.00110475  |
| MIR100HG     | 2.17037   | 29.6298   | 0.073249566 | -1.135194942 | 0.00217718  |
| MIR3648      | 18523.8   | 13.6032   | 1361.723712 | 3.134089     | 9.59E-14    |

|           |          |          |             |              |             |
|-----------|----------|----------|-------------|--------------|-------------|
| MIR663    | 204016   | 317.216  | 643.1453647 | 2.808309144  | 6.93E-11    |
| MMP25     | 25.3516  | 0.399197 | 63.50648928 | 1.802818105  | 1.99E-06    |
| MNT       | 13.1099  | 0.818998 | 16.007243   | 1.204316538  | 0.000502107 |
| MPND      | 24.2754  | 1.28378  | 18.90931468 | 1.276675789  | 0.00152121  |
| MPO       | 1.55591  | 34.2068  | 0.045485401 | -1.342127976 | 0.000434309 |
| MPST      | 13.1945  | 0.349853 | 37.71441148 | 1.576507335  | 0.000463461 |
| MRC1      | 7.81949  | 44.5887  | 0.17536932  | -0.756046382 | 0.00101374  |
| MRC2      | 11.6422  | 1.3363   | 8.71226521  | 0.940131087  | 0.00304443  |
| MRPL36    | 12.4051  | 0.256434 | 48.37541044 | 1.684624663  | 0.00115704  |
| MRPL53    | 20.4898  | 0.232947 | 87.95906365 | 1.944280598  | 0.000108722 |
| MS4A3     | 0        | 31.4027  | 0           | #NUM!        | 0.00237693  |
| MTHFR     | 16.0249  | 2.29507  | 6.982314265 | 0.843999392  | 0.00269366  |
| MTRNR2L10 | 374.036  | 6.67688  | 56.01957801 | 1.748339833  | 1.11E-08    |
| MTRNR2L2  | 1305.46  | 150.944  | 8.648637905 | 0.936947715  | 0.000391868 |
| MTRNR2L4  | 26.2734  | 0.040748 | 644.7776578 | 2.80940998   | 2.32E-08    |
| MTRNR2L6  | 215.309  | 9.21931  | 23.35413388 | 1.368363765  | 1.51E-06    |
| MYD88     | 0        | 23.5347  | 0           | #NUM!        | 0.00116004  |
| MYL5      | 27.4372  | 0.878241 | 31.24108303 | 1.494726081  | 0.00140367  |
| MYO15B    | 11.0907  | 1.21993  | 9.091259335 | 0.958624046  | 0.0011041   |
| N4BP3     | 25.8753  | 0.140732 | 183.8622346 | 2.264492534  | 5.87E-09    |
| NACC1     | 19.8432  | 1.34863  | 14.71359824 | 1.167718893  | 0.000282895 |
| NAGK      | 31.7341  | 2.83985  | 11.17456908 | 1.048230785  | 0.0023563   |
| NAPSB     | 26.2374  | 1.72769  | 15.18640497 | 1.181454977  | 0.00268364  |
| NBEAL2    | 26.0983  | 3.17206  | 8.227555595 | 0.915270826  | 0.000467726 |
| NCF1      | 58.0141  | 6.64746  | 8.727258231 | 0.940877827  | 0.00286226  |
| NCF1B     | 63.2302  | 6.33227  | 9.985392284 | 0.999365131  | 0.00122753  |
| NCF1C     | 63.4316  | 5.5286   | 11.47335673 | 1.059690497  | 0.000826114 |
| NDUFA12   | 23.647   | 0.106502 | 222.033389  | 2.346418288  | 1.00E-05    |
| NDUFB5    | 25.8633  | 1.34436  | 19.23837365 | 1.284168355  | 0.00189941  |
| NFAM1     | 23.6541  | 1.35261  | 17.48774591 | 1.242733835  | 4.87E-05    |
| NFKB2     | 28.1443  | 2.30825  | 12.19291671 | 1.086107607  | 3.43E-05    |
| NFYB      | 0.190565 | 6.18419  | 0.030814868 | -1.511239685 | 0.000633755 |
| NKG7      | 110.102  | 5.86585  | 18.76999923 | 1.273464255  | 0.000220143 |
| NKX2-1    | 16.6775  | 0.813209 | 20.50825802 | 1.311928773  | 0.00200224  |
| NME3      | 12.1946  | 0.284403 | 42.87788807 | 1.632233386  | 0.000801358 |
| NOTCH3    | 14.0183  | 1.73984  | 8.057235148 | 0.906186039  | 0.00152577  |
| NR1H2     | 21.3965  | 0.684111 | 31.2763572  | 1.495216164  | 0.000183385 |
| NR2F6     | 11.5772  | 0.561677 | 20.61184631 | 1.314116896  | 0.00243156  |
| OLFM2     | 1.06768  | 27.3176  | 0.039083961 | -1.408001434 | 0.000620035 |
| OPA3      | 15.3893  | 1.92526  | 7.993361936 | 0.902729478  | 0.00101786  |
| OR7E12P   | 1.23329  | 24.7637  | 0.049802332 | -1.302750324 | 0.0021281   |
| ORAI1     | 14.1877  | 0.724917 | 19.57148198 | 1.291623712  | 0.00281137  |
| ORM1      | 142.63   | 1.45279  | 98.1766119  | 1.99200804   | 3.56E-07    |
| PATZ1     | 0        | 9.65063  | 0           | #NUM!        | 0.00181171  |
| PCIF1     | 13.4037  | 0.938227 | 14.28620153 | 1.154916772  | 0.00257418  |
| PCOLCE    | 33.2935  | 2.89367  | 11.50563126 | 1.060910451  | 0.00249057  |
| PDCD6IP   | 0        | 64.6853  | 0           | #NUM!        | 0.00119069  |

|          |          |            |             |              |             |
|----------|----------|------------|-------------|--------------|-------------|
| PDE4A    | 14.9493  | 1.3983     | 10.69105342 | 1.0290205    | 0.00123885  |
| PDLIM2   | 15.5269  | 0.766483   | 20.25733121 | 1.306582229  | 0.00133621  |
| PDZK1IP1 | 44.4395  | 1.45792    | 30.48143931 | 1.48403547   | 0.000349531 |
| PEX6     | 16.0561  | 0.0126758  | 1266.673504 | 3.102664686  | 1.98E-10    |
| PGAM2    | 24.3514  | 0.449444   | 54.18116606 | 1.733848347  | 0.000209954 |
| PGLS     | 15.0331  | 0.0252293  | 595.8587832 | 2.775143345  | 1.14E-07    |
| PHC2     | 51.7772  | 6.09889    | 8.489610405 | 0.928887761  | 0.00226828  |
| PIEZO1   | 19.7223  | 2.456      | 8.030252443 | 0.904729198  | 0.000902122 |
| PILRA    | 43.6988  | 2.67978    | 16.30686101 | 1.21237037   | 0.0013699   |
| PIM3     | 31.0113  | 2.94833    | 10.51825949 | 1.021943881  | 0.00160111  |
| PIN1     | 15.6212  | 0.137112   | 113.9302176 | 2.056638927  | 9.43E-06    |
| PINK1    | 14.8346  | 1.06293    | 13.95632826 | 1.144771176  | 0.00234892  |
| PIP5K1C  | 11.6338  | 1.21723    | 9.557602097 | 0.980348946  | 0.00140702  |
| PISD     | 23.1327  | 2.20233    | 10.50373922 | 1.021343931  | 0.00224367  |
| PKD1P1   | 48.9593  | 7.69819    | 6.359845626 | 0.803446574  | 0.00161435  |
| PKM2     | 195.879  | 29.2977    | 6.685814927 | 0.825154351  | 7.54E-06    |
| PLAU     | 1.38913  | 20.9635    | 0.066264221 | -1.178720902 | 0.00291575  |
| PLD6     | 10.4402  | 0.184826   | 56.48664149 | 1.751945754  | 8.29E-05    |
| PLEC     | 22.3012  | 2.40509    | 9.272501237 | 0.9671969    | 9.29E-06    |
| PLEKHM2  | 29.9875  | 4.5285     | 6.621949873 | 0.820985889  | 0.00309618  |
| PLEKHO2  | 30.6294  | 4.34705    | 7.046019715 | 0.847943854  | 0.00238805  |
| PLOD1    | 29.7915  | 3.67091    | 8.115562626 | 0.909318633  | 0.00249771  |
| PML      | 57.7717  | 12.1369    | 4.760004614 | 0.677607374  | 0.000304512 |
| PMVK     | 16.1495  | 0.229259   | 70.44216367 | 1.847832687  | 7.98E-05    |
| POMGNT1  | 14.6377  | 0.833031   | 17.57161498 | 1.244811679  | 0.000621433 |
| POTEF    | 14.6335  | 1.02554    | 14.269068   | 1.154395608  | 0.000736276 |
| PPDPF    | 79.602   | 1.31802    | 60.39513816 | 1.781001979  | 1.65E-05    |
| PPIEL    | 0.25671  | 20.9876    | 0.012231508 | -1.912519992 | 1.13E-05    |
| PRADC1   | 11.5938  | 0.261993   | 44.25232735 | 1.645936116  | 0.000706893 |
| PRIC285  | 21.9297  | 2.76585    | 7.928738001 | 0.899204067  | 9.04E-05    |
| PRKY     | 15.5878  | 0.00743828 | 2095.61888  | 3.321312302  | 1.23E-12    |
| PRMT3    | 0.123486 | 4.00243    | 0.030852757 | -1.510706022 | 0.00126089  |
| PRR24    | 27.4773  | 1.39861    | 19.64614868 | 1.293277426  | 0.00297135  |
| PRR5     | 203.406  | 0.455893   | 446.170483  | 2.649500836  | 7.39E-12    |
| PRRG2    | 11.0245  | 0.228673   | 48.21076384 | 1.683144012  | 0.000395187 |
| PSMG4    | 30.9262  | 1.0538     | 29.34731448 | 1.467568366  | 0.000277422 |
| PTCH2    | 19.3403  | 0.331398   | 58.35973663 | 1.766113323  | 3.21E-06    |
| PTMS     | 71.5693  | 4.24794    | 16.84800162 | 1.226548396  | 0.00032271  |
| PTOV1    | 20.597   | 1.41805    | 14.52487571 | 1.162112425  | 0.00231164  |
| PTPRCAP  | 18.7785  | 0.447134   | 41.99747727 | 1.623223204  | 0.000584654 |
| PTRH1    | 18.7082  | 0.205932   | 90.84649302 | 1.958308167  | 7.62E-05    |
| PVRIG    | 12.7298  | 0.551398   | 23.08640945 | 1.363356394  | 0.00198867  |
| QSOX1    | 44.8392  | 6.98405    | 6.42022895  | 0.807550516  | 0.00219925  |
| RAB25    | 16.4069  | 0.427739   | 38.35726927 | 1.583847681  | 0.000656901 |
| RAB5C    | 52.8522  | 4.8255     | 10.95268884 | 1.03952075   | 0.000429682 |
| RAI14    | 0        | 35.2078    | 0           | #NUM!        | 4.44E-05    |
| RALY     | 13.0341  | 1.11459    | 11.69407585 | 1.067965906  | 0.00115761  |



|          |          |           |             |              |             |
|----------|----------|-----------|-------------|--------------|-------------|
| RANBP3   | 11.3784  | 0.50942   | 22.33598995 | 1.349005206  | 0.000333632 |
| RASGRP4  | 15.6043  | 1.62131   | 9.624501175 | 0.98337823   | 0.000519902 |
| RBBP6    | 0        | 12.591    | 0           | #NUM!        | 0.0018636   |
| RBCK1    | 25.3729  | 2.18792   | 11.59681341 | 1.06433867   | 0.001335    |
| RBM12    | 0        | 10.188    | 0           | #NUM!        | 0.000254875 |
| RBP5     | 30.7914  | 0.626258  | 49.16727611 | 1.691676149  | 0.000150328 |
| RHBDF2   | 35.4022  | 5.37869   | 6.581937238 | 0.818353737  | 0.00208053  |
| RMRP     | 9047.36  | 906.607   | 9.979362612 | 0.999102804  | 0.000100622 |
| RNU11    | 21085.1  | 134.556   | 156.7012991 | 2.195072597  | 3.06E-08    |
| RNU12    | 71246.6  | 52.255    | 1363.440819 | 3.134636292  | 2.04E-14    |
| RNU6ATAC | 23663.2  | 57.1524   | 414.0368558 | 2.617039002  | 1.19E-09    |
| RPL10L   | 16.5889  | 0.0346643 | 478.5586324 | 2.679935155  | 4.14E-07    |
| RPL11    | 311.148  | 24.8943   | 12.49876478 | 1.096867095  | 0.000195079 |
| RPL13    | 34.0299  | 4.61666   | 7.371108117 | 0.867532781  | 0.00167371  |
| RPL13AP3 | 34.6009  | 2.664     | 12.98832583 | 1.113553175  | 0.00200602  |
| RPL13AP6 | 123.153  | 4.06367   | 30.30585653 | 1.481526563  | 8.83E-05    |
| RPL19    | 185.557  | 19.2598   | 9.63441988  | 0.983825569  | 0.000971822 |
| RPL36    | 259.064  | 12.8118   | 20.22073401 | 1.305796916  | 0.000615242 |
| RPL37A   | 177.917  | 10.4938   | 16.95448741 | 1.229284664  | 0.00125787  |
| RPLP1    | 798.743  | 98.2727   | 8.127821867 | 0.909974177  | 0.000107002 |
| RPPH1    | 6589.27  | 244.98    | 26.89717528 | 1.429706673  | 6.11E-08    |
| RPS3     | 223.608  | 32.9192   | 6.792631656 | 0.832038065  | 0.00213179  |
| RPS5     | 105.333  | 9.77035   | 10.78088298 | 1.032654332  | 0.00212037  |
| RPS9     | 255.077  | 30.8723   | 8.262325774 | 0.917102315  | 0.00102363  |
| RRNAD1   | 16.6839  | 0.475457  | 35.0902395  | 1.545186332  | 0.000786451 |
| RSPO2    | 0.106051 | 3.96323   | 0.02675873  | -1.572534509 | 0.000692651 |
| S100A14  | 33.6262  | 0.824588  | 40.77939529 | 1.610440781  | 0.000173777 |
| SCAF1    | 11.2798  | 0.980401  | 11.50529222 | 1.060897654  | 0.00257303  |
| SCAP     | 15.4364  | 1.70551   | 9.050899731 | 0.956691754  | 0.00308975  |
| SCARNA11 | 1661.09  | 12.1405   | 136.8222067 | 2.13615659   | 2.15E-05    |
| SCARNA13 | 4213.58  | 711.867   | 5.919055104 | 0.772252383  | 0.00236387  |
| SCARNA17 | 320.915  | 12.5917   | 25.48623299 | 1.406305649  | 7.93E-05    |
| SCARNA2  | 1518.05  | 31.3819   | 48.37342545 | 1.684606842  | 2.63E-08    |
| SCARNA8  | 2704.27  | 70.3062   | 38.46417528 | 1.585056425  | 0.000654387 |
| SCARNA9L | 28.8415  | 0.44211   | 65.23602723 | 1.814487505  | 0.000649134 |
| SCP2     | 0        | 36.4004   | 0           | #NUM!        | 0.000115036 |
| SDF4     | 29.2771  | 2.9797    | 9.825519348 | 0.992355515  | 0.00178894  |
| SECTM1   | 23.4418  | 2.14123   | 10.94781971 | 1.039327637  | 0.00271277  |
| SELENBP1 | 26.3439  | 2.08886   | 12.61161591 | 1.100770736  | 0.00268026  |
| SEMA3F   | 25.9023  | 1.6578    | 15.62450235 | 1.193806194  | 0.000222328 |
| SEPT9    | 31.1649  | 6.52694   | 4.774810248 | 0.678956117  | 0.00297581  |
| SEPX1    | 26.0298  | 0.719384  | 36.18345696 | 1.558510057  | 0.000215466 |
| SERPINH1 | 92.8401  | 10.9439   | 8.483273787 | 0.928563484  | 0.000174857 |
| SFTPA2   | 373.463  | 41.5098   | 8.996983845 | 0.954096941  | 0.000218996 |
| SFTPB    | 195.455  | 25.833    | 7.566097627 | 0.878871941  | 0.00261787  |
| SH2D3C   | 18.7232  | 2.04037   | 9.176374873 | 0.962671147  | 0.000448318 |
| SH3D19   | 0        | 12.8065   | 0           | #NUM!        | 0.0023641   |

|               |          |          |             |              |             |
|---------------|----------|----------|-------------|--------------|-------------|
| SH3GLB2       | 12.3368  | 0.704332 | 17.51560344 | 1.243425104  | 0.00289917  |
| SHANK3        | 22.8795  | 3.64049  | 6.284730902 | 0.798286687  | 0.00269694  |
| SHMT2         | 0        | 14.8758  | 0           | #NUM!        | 0.00236699  |
| SIRPB2        | 30.215   | 2.37929  | 12.69916656 | 1.103775219  | 0.000834878 |
| SLAMF1        | 11.1777  | 0.406966 | 27.46593081 | 1.438794322  | 0.000999274 |
| SLC16A10      | 0.193714 | 5.10585  | 0.037939618 | -1.420907043 | 0.0015956   |
| SLC16A3       | 54.2524  | 0        | #DIV/0!     | #DIV/0!      | 0.00119746  |
| SLC19A1       | 11.2384  | 0.31885  | 35.24666771 | 1.547118064  | 3.47E-05    |
| SLC19A2       | 1.33479  | 18.6864  | 0.071431094 | -1.146112697 | 0.00265514  |
| SLC1A5        | 34.6018  | 3.09435  | 11.18225152 | 1.048529257  | 0.00064501  |
| SLC22A18      | 19.811   | 0.203283 | 97.45527171 | 1.988805337  | 1.91E-05    |
| SLC22A31      | 18.0987  | 0.630982 | 28.68338558 | 1.457630411  | 0.00043578  |
| SLC25A6       | 148.828  | 24.0308  | 6.193218703 | 0.791916417  | 8.69E-05    |
| SLC2A4RG      | 14.9511  | 0.634238 | 23.57332736 | 1.372420887  | 0.00071804  |
| SLC38A10      | 24.1665  | 1.8602   | 12.99134502 | 1.113654117  | 4.01E-05    |
| SLC3A2        | 57.5616  | 7.58573  | 7.588142473 | 0.880135476  | 0.00146555  |
| SLC4A2        | 14.4506  | 1.73075  | 8.349328326 | 0.921651539  | 0.00141826  |
| SLC4A7        | 1.18573  | 16.8291  | 0.070457125 | -1.152075083 | 0.00130913  |
| SLC7A11       | 0.134599 | 7.14661  | 0.018833965 | -1.725058249 | 3.77E-05    |
| SLC7A5P1      | 33       | 0.281385 | 117.2770404 | 2.069212997  | 2.91E-05    |
| SLC9A3R2      | 24.2554  | 1.86858  | 12.98065911 | 1.113296745  | 0.000672309 |
| SLX1A-SULT1A3 | 13.1026  | 0.83938  | 15.60985489 | 1.193398866  | 0.00297623  |
| SMAD5         | 0        | 12.4211  | 0           | #NUM!        | 0.00267331  |
| SMAD6         | 19.0828  | 2.15169  | 8.86874968  | 0.947862397  | 0.0018862   |
| SNORA10       | 44051.2  | 69.963   | 629.6356646 | 2.79908932   | 1.36E-11    |
| SNORA11       | 7228.13  | 231.006  | 31.28979334 | 1.495402695  | 0.000221816 |
| SNORA14B      | 1883.9   | 8.68105  | 217.0129189 | 2.336485588  | 7.35E-06    |
| SNORA16A      | 4013.96  | 17.9935  | 223.0783338 | 2.348457392  | 8.95E-07    |
| SNORA21       | 5098.73  | 51.3062  | 99.37843769 | 1.997292165  | 9.56E-06    |
| SNORA24       | 2898.59  | 45.1969  | 64.13249581 | 1.807078141  | 0.000129486 |
| SNORA31       | 4464.64  | 156.447  | 28.53771565 | 1.455419206  | 0.000757913 |
| SNORA34       | 4413.59  | 20.2342  | 218.1252533 | 2.338705949  | 5.42E-07    |
| SNORA42       | 6791.72  | 22.4919  | 301.9629289 | 2.479953629  | 6.20E-08    |
| SNORA51       | 1789.6   | 33.8696  | 52.83794317 | 1.722945903  | 0.000447316 |
| SNORA52       | 1727.72  | 40.4854  | 42.67513721 | 1.630174926  | 0.000778739 |
| SNORA54       | 9741.53  | 48.3014  | 201.6821459 | 2.304667454  | 3.46E-07    |
| SNORA57       | 6625.71  | 38.5037  | 172.0798261 | 2.235729958  | 1.97E-07    |
| SNORA6        | 2252.34  | 41.2539  | 54.59701992 | 1.737168938  | 0.000135447 |
| SNORA60       | 2101.35  | 46.0918  | 45.59053888 | 1.658874726  | 0.000456941 |
| SNORA61       | 9895.51  | 130.373  | 75.90152869 | 1.880250523  | 6.43E-06    |
| SNORA62       | 2495.79  | 2.37651  | 1050.191247 | 3.021268394  | 1.67E-09    |
| SNORA64       | 6061.91  | 49.4822  | 122.5068813 | 2.088160484  | 2.85E-06    |
| SNORA65       | 7756.66  | 251.41   | 30.85263116 | 1.489292207  | 0.000136022 |
| SNORA68       | 6714.09  | 111.941  | 59.97882813 | 1.777997976  | 2.88E-05    |
| SNORA70       | 26889    | 308.177  | 87.25180659 | 1.940774428  | 1.10E-07    |
| SNORA71B      | 4111.03  | 25.141   | 163.5189531 | 2.213568098  | 2.22E-06    |
| SNORA71D      | 2947.21  | 11.7304  | 251.2454818 | 2.400098261  | 7.79E-07    |

|          |          |           |             |              |             |
|----------|----------|-----------|-------------|--------------|-------------|
| SNORA74B | 1932.13  | 86.1098   | 22.43798035 | 1.350983763  | 0.00021926  |
| SNORA77  | 3507.32  | 50.8022   | 69.03874242 | 1.839092872  | 0.000112109 |
| SNORA7A  | 34300.4  | 64.2545   | 533.8209775 | 2.727395636  | 3.14E-11    |
| SNORA8   | 12821.2  | 313.713   | 40.86920211 | 1.611396159  | 1.08E-05    |
| SNORA80B | 2235.33  | 12.5705   | 177.8234756 | 2.249989094  | 5.46E-06    |
| SNORD15B | 7373.9   | 69.3206   | 106.3738629 | 2.026834931  | 1.10E-06    |
| SNORD16  | 5933.38  | 93.2086   | 63.65700161 | 1.803846178  | 0.000288778 |
| SNORD17  | 4289.41  | 184.521   | 23.24618878 | 1.36635176   | 3.44E-06    |
| SNORD22  | 11019    | 79.2711   | 139.0040002 | 2.143027298  | 7.68E-07    |
| SNORD67  | 3132.08  | 36.3321   | 86.20696299 | 1.935542345  | 0.000135206 |
| SNUPN    | 11.2225  | 0.643873  | 17.42967946 | 1.2412894    | 0.00237973  |
| SNX20    | 15.2284  | 0.32499   | 46.85805717 | 1.670784278  | 9.65E-05    |
| SNX4     | 0.314074 | 15.0884   | 0.020815593 | -1.681611203 | 0.000104864 |
| SOCS1    | 28.7778  | 1.81957   | 15.8157147  | 1.199088822  | 0.0024592   |
| SOCS3    | 73.2804  | 10.5491   | 6.94660208  | 0.841772422  | 0.00140261  |
| SPAG1    | 0.166899 | 5.46476   | 0.030540957 | -1.515117359 | 0.000624287 |
| SPC25    | 0.182185 | 6.57816   | 0.027695435 | -1.557591816 | 0.00166792  |
| SPDYE5   | 11.6116  | 0.538052  | 21.58081375 | 1.334067817  | 0.00106823  |
| SPR      | 12.9324  | 0.0333254 | 388.0643593 | 2.588903758  | 5.27E-07    |
| SQSTM1   | 72.0748  | 9.48635   | 7.597737802 | 0.880684302  | 0.000310648 |
| ST14     | 12.2402  | 0.674369  | 18.15059708 | 1.258890916  | 0.00103293  |
| STAB1    | 20.0283  | 2.59798   | 7.709181749 | 0.887008285  | 0.00104956  |
| STAG3L3  | 36.8541  | 3.77604   | 9.759986653 | 0.989449224  | 0.00220221  |
| STAT6    | 0        | 18.3767   | 0           | #NUM!        | 0.0001698   |
| STX16    | 0        | 13.675    | 0           | #NUM!        | 0.000840268 |
| SULT1C4  | 0.071271 | 2.94944   | 0.024164248 | -1.616826713 | 0.0014793   |
| SYNGR2   | 39.3883  | 4.1946    | 9.390239832 | 0.972676685  | 0.00308981  |
| SYNRG    | 0        | 8.96484   | 0           | #NUM!        | 0.000923933 |
| SYTL2    | 0        | 7.19164   | 0           | #NUM!        | 0.00107766  |
| TAMM41   | 26.0784  | 1.11694   | 23.34807599 | 1.368251098  | 0.00092866  |
| TBCE     | 0.366015 | 14.0365   | 0.026075945 | -1.583759946 | 0.000361805 |
| TCERG1   | 0        | 7.73723   | 0           | #NUM!        | 0.00239552  |
| TCF7     | 16.2728  | 0.72457   | 22.45856163 | 1.351381938  | 0.000875883 |
| TCTEX1D4 | 19.5219  | 1.08557   | 17.98308723 | 1.254864251  | 0.00295829  |
| TEKT4P2  | 17.7342  | 0.275898  | 64.27810278 | 1.80806305   | 1.19E-05    |
| TERC     | 63.7305  | 0.513581  | 124.0904551 | 2.093738377  | 1.61E-05    |
| TFEC     | 0        | 5.38518   | 0           | #NUM!        | 0.00190032  |
| TGFBR3   | 0        | 8.15226   | 0           | #NUM!        | 0.00136128  |
| THAP1    | 0.588983 | 11.6717   | 0.050462486 | -1.297031356 | 0.00259228  |
| TICAM1   | 11.4553  | 0.676908  | 16.92297919 | 1.22847682   | 0.00209614  |
| TMEM11   | 14.0174  | 0.824654  | 16.9979167  | 1.230395697  | 0.00295748  |
| TMEM115  | 16.2365  | 1.14905   | 14.13036857 | 1.15015349   | 0.00306405  |
| TMEM154  | 2.07386  | 29.6203   | 0.070014821 | -1.154810018 | 0.00182784  |
| TMEM40   | 0.704781 | 19.1258   | 0.036849753 | -1.433565422 | 0.000780303 |
| TMEM54   | 12.7821  | 0.106184  | 120.3768929 | 2.08054313   | 4.00E-05    |
| TMEM8A   | 14.3564  | 1.17927   | 12.17397203 | 1.0854323    | 0.00189461  |
| TMEM91   | 34.6658  | 0.409661  | 84.62069858 | 1.927476606  | 1.09E-05    |

|          |            |           |             |              |             |
|----------|------------|-----------|-------------|--------------|-------------|
| TMUB1    | 15.2417    | 0.832273  | 18.3133419  | 1.262767603  | 0.00301604  |
| TNFRSF6B | 54.8639    | 2.92706   | 18.74368821 | 1.272855051  | 0.000453875 |
| TNRC18   | 15.1055    | 1.11409   | 13.5585994  | 1.132214829  | 7.71E-05    |
| TOM1     | 0          | 15.0224   | 0           | #NUM!        | 0.00151481  |
| TOX      | 0.159082   | 9.58903   | 0.016589999 | -1.780153635 | 4.58E-05    |
| TPI1     | 233.252    | 34.3609   | 6.788297163 | 0.831760846  | 0.000593659 |
| TPI1P3   | 25.4878    | 0.901236  | 28.28093862 | 1.451493819  | 0.000601419 |
| TPM1     | 0          | 35.6631   | 0           | #NUM!        | 6.30E-05    |
| TPM3     | 69.8261    | 0         | #DIV/0!     | #DIV/0!      | 0.000176607 |
| TRAF3    | 12.8088    | 0         | #DIV/0!     | #DIV/0!      | 0.00183931  |
| TSPAN18  | 19.0672    | 0.352203  | 54.13696079 | 1.733493871  | 4.77E-06    |
| TSTA3    | 16.1362    | 0.670635  | 24.06107644 | 1.381315053  | 0.00160498  |
| TTYH3    | 14.453     | 1.51403   | 9.546045983 | 0.979823522  | 0.00227434  |
| TUBB2C   | 45.7159    | 4.94397   | 9.246799637 | 0.965991447  | 0.00280471  |
| TXNRD1   | 0          | 17.8744   | 0           | #NUM!        | 0.000228365 |
| UBE2M    | 31.3081    | 0.601923  | 52.01346352 | 1.716115774  | 3.45E-05    |
| UBE2S    | 20.5486    | 0.625474  | 32.8528444  | 1.516572977  | 0.000595858 |
| UCHL1    | 0.11304    | 9.53318   | 0.011857533 | -1.926005644 | 9.02E-05    |
| UNC45A   | 15.5124    | 1.4346    | 10.81304893 | 1.033948168  | 0.00291688  |
| URM1     | 30.0267    | 0.950724  | 31.58298307 | 1.499453148  | 0.000296244 |
| USF2     | 28.6152    | 2.58692   | 11.06149398 | 1.043813787  | 0.00138646  |
| VAMP7    | 0          | 15.1808   | 0           | #NUM!        | 0.00108998  |
| VDR      | 22.8246    | 3.17483   | 7.189235329 | 0.8566827    | 0.00276331  |
| VILL     | 13.7429    | 0.0323391 | 424.9623521 | 2.628350457  | 2.63E-08    |
| VPS13A   | 0          | 6.82611   | 0           | #NUM!        | 0.00100619  |
| VPS13C   | 0          | 18.4423   | 0           | #NUM!        | 0.00138235  |
| VPS16    | 17.3359    | 1.33317   | 13.00351793 | 1.114060861  | 0.0020148   |
| VRK2     | 0          | 22.2284   | 0           | #NUM!        | 0.00240637  |
| VTRNA1-1 | 32775.3    | 107.24    | 305.6256994 | 2.48518987   | 5.35E-08    |
| VTRNA2-1 | 91311.9    | 23.3021   | 3918.612486 | 3.593132318  | 2.31E-14    |
| WARS     | 181.509    | 37.3504   | 4.859626671 | 0.686602907  | 0.000911338 |
| WAS      | 28.0325    | 1.07965   | 25.96443292 | 1.414378842  | 0.000235269 |
| WBP4     | 0.244451   | 43.0824   | 0.005674034 | -2.24610807  | 2.74E-07    |
| WFDC2    | 47.2895    | 1.57007   | 30.11935774 | 1.478845707  | 0.000997577 |
| XIST     | 0.00546227 | 31.0022   | 0.00017619  | -3.75401935  | 6.44E-15    |
| ZBTB16   | 33.2785    | 2.48466   | 13.39358303 | 1.126896774  | 0.000521743 |
| ZBTB7B   | 19.9561    | 1.4868    | 13.42218187 | 1.127823119  | 0.000678437 |
| ZC3H7B   | 20.7563    | 1.62112   | 12.80367894 | 1.107334775  | 0.000208544 |
| ZC3HC1   | 11.3808    | 0.598797  | 19.00610725 | 1.278893176  | 0.00279867  |
| ZDHHC18  | 19.5089    | 1.47261   | 13.24783887 | 1.122145037  | 0.00106227  |
| ZDHHC19  | 17.1694    | 0.0923111 | 185.994967  | 2.269501192  | 2.35E-06    |
| ZDHHC3   | 0          | 5.46559   | 0           | #NUM!        | 0.00171625  |
| ZFHX3    | 15.8479    | 3.17219   | 4.995886123 | 0.69861253   | 0.00256203  |
| ZFP36L1  | 93.1294    | 14.2218   | 6.548355342 | 0.816132238  | 0.00139248  |
| ZNF215   | 0.180858   | 5.0226    | 0.03600884  | -1.443590868 | 0.00116473  |
| ZNF25    | 1.38545    | 18.7893   | 0.073736116 | -1.132319744 | 0.0028126   |
| ZNF341   | 12.378     | 0.831914  | 14.87894181 | 1.172572045  | 0.00176271  |

|        |          |          |             |              |             |
|--------|----------|----------|-------------|--------------|-------------|
| ZNF415 | 0.142922 | 4.07481  | 0.035074519 | -1.455008278 | 0.00195211  |
| ZNF593 | 12.3658  | 0.141667 | 87.28779462 | 1.940953521  | 0.000219668 |
| ZNF598 | 10.5394  | 0.760387 | 13.86057363 | 1.141781204  | 0.00308546  |
| ZNF703 | 12.2045  | 0.318143 | 38.36168012 | 1.58389762   | 0.000283338 |
| ZNF738 | 0.241061 | 4.85457  | 0.049656509 | -1.304023814 | 0.00104979  |
| ZNF740 | 11.0322  | 0.597553 | 18.46229539 | 1.266285695  | 0.000686864 |

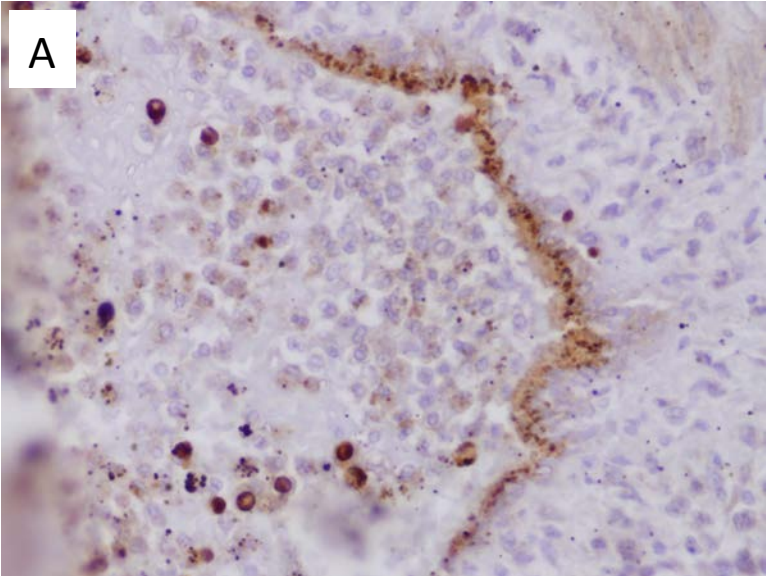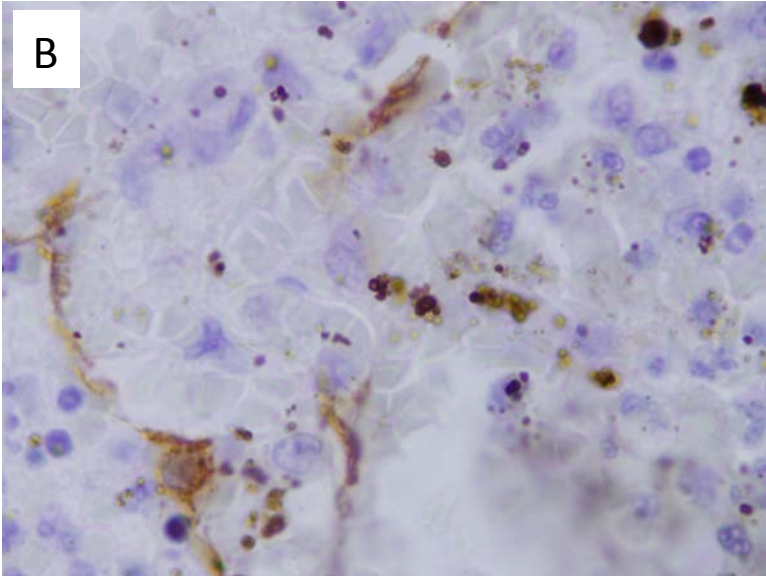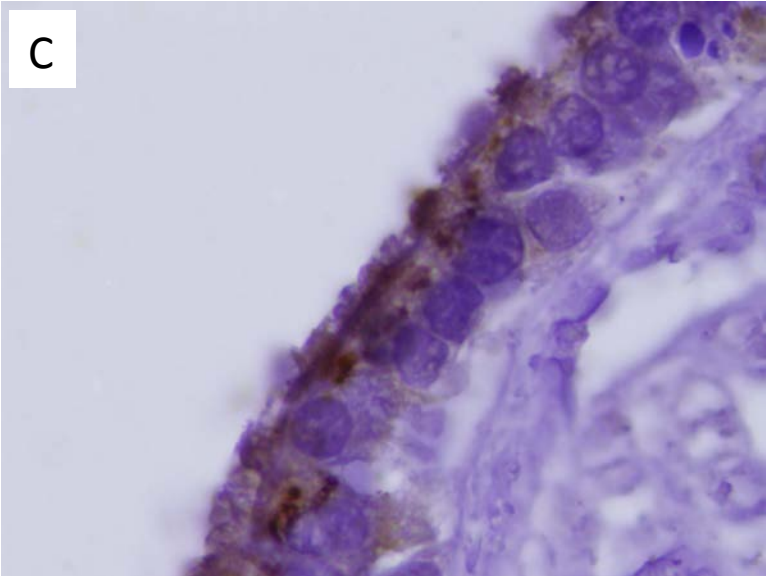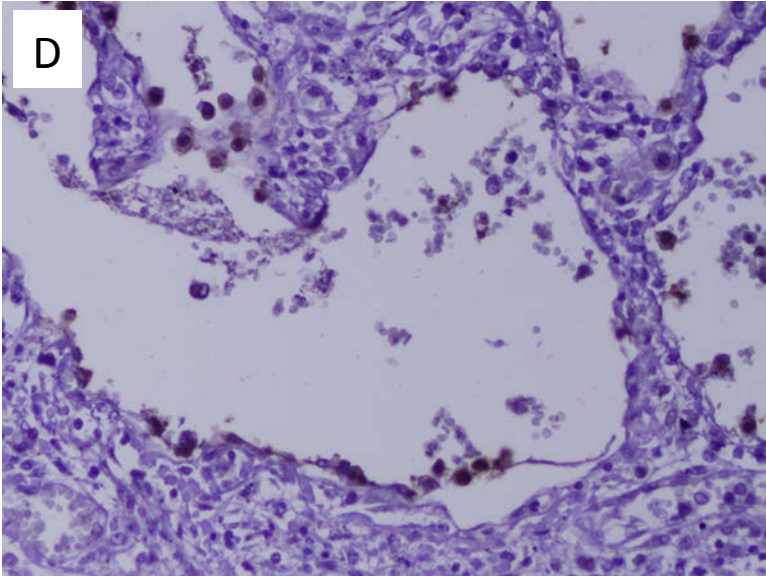

Genomatix Gene Ontology Analysis  
1918 vs. 2009 autopsy  
Cufflink called differentially expressed genes

GO: Cellular response to cytokine stimulus  
p-value = 2.31e-06

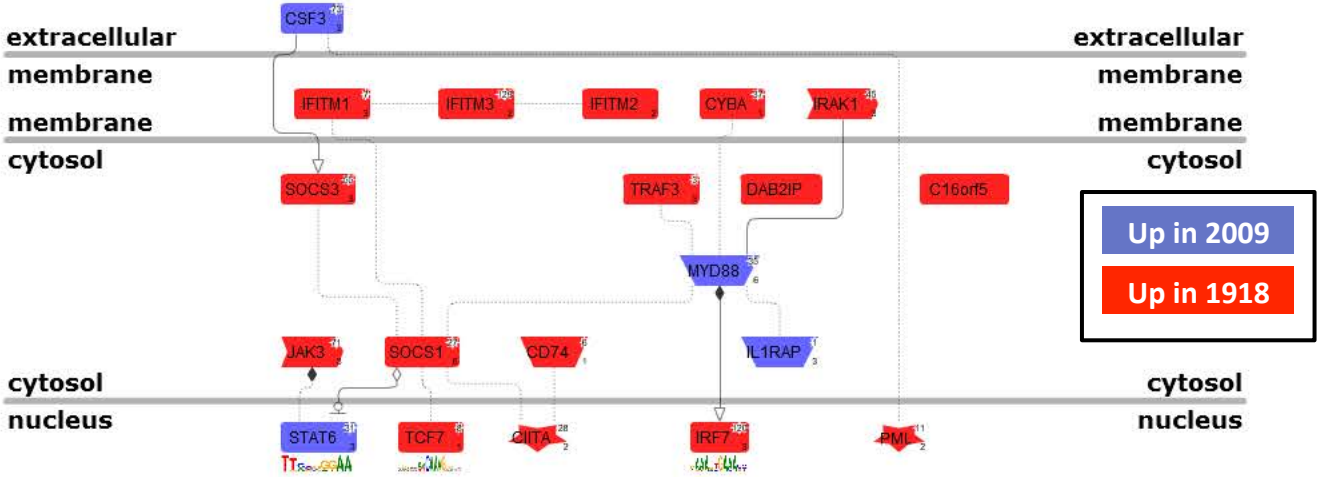

Genomatix Gene Ontology Analysis  
1918 vs. 2009 autopsy  
Cufflink called differentially expressed genes

GO: Immune system process  
p-value = 4.89e-05

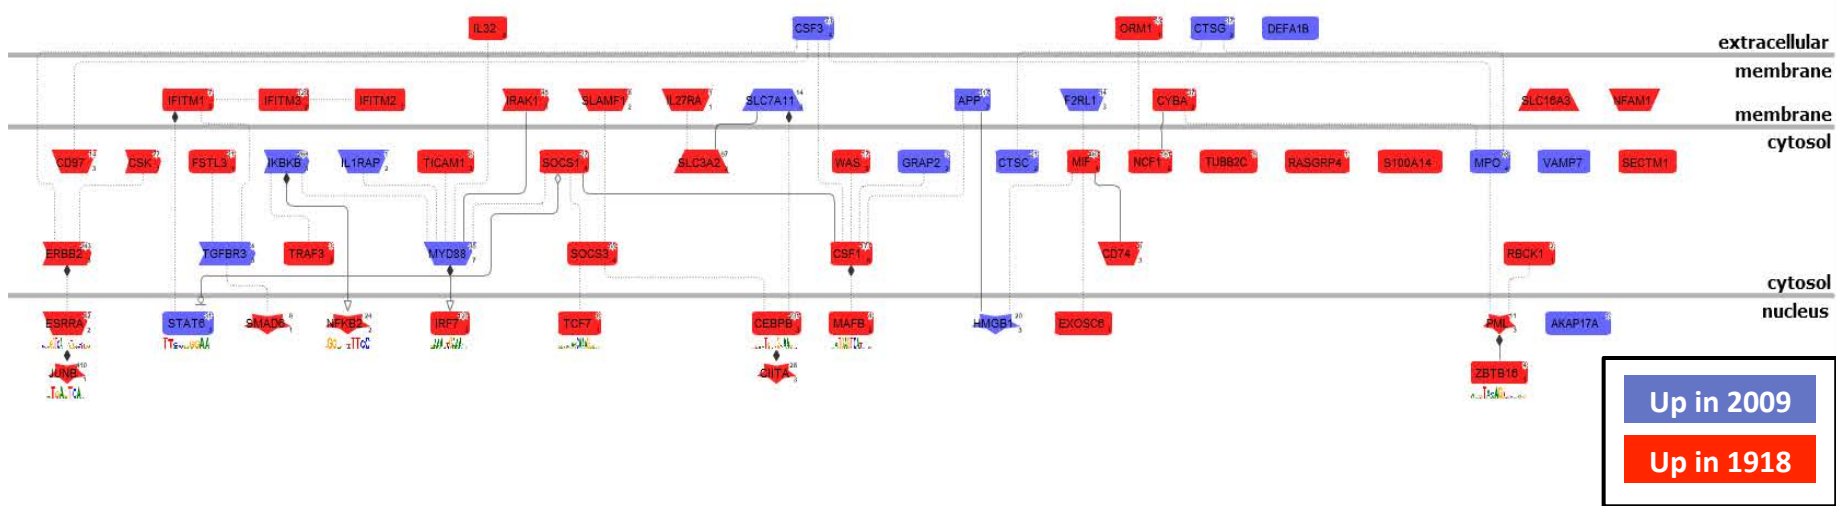



A

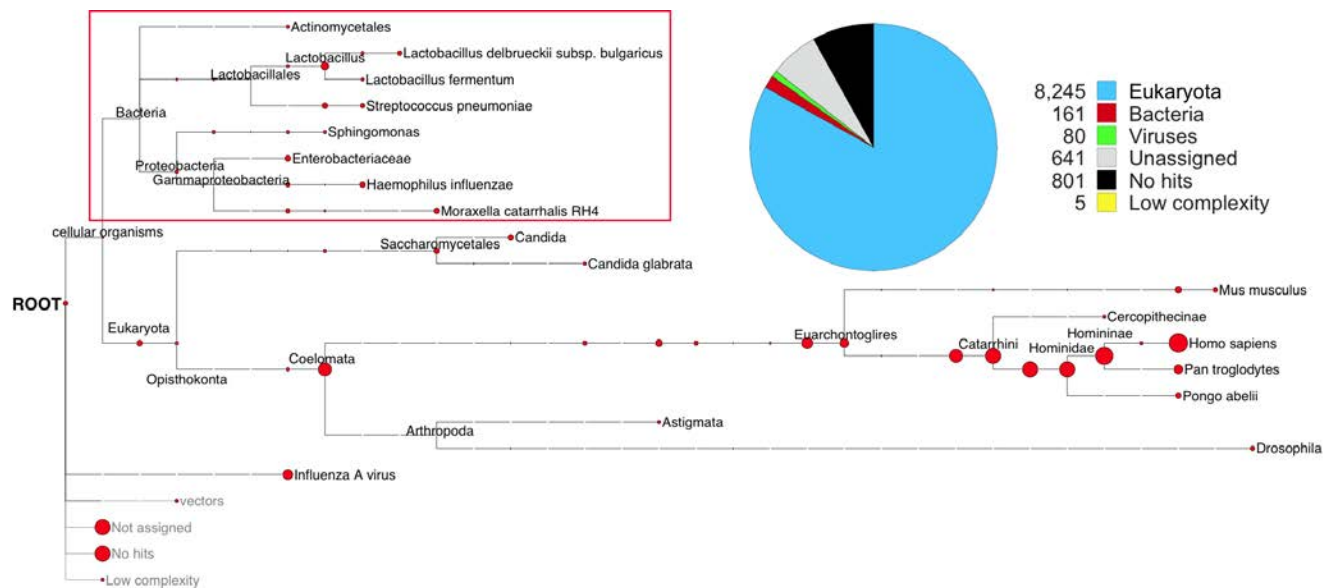

B

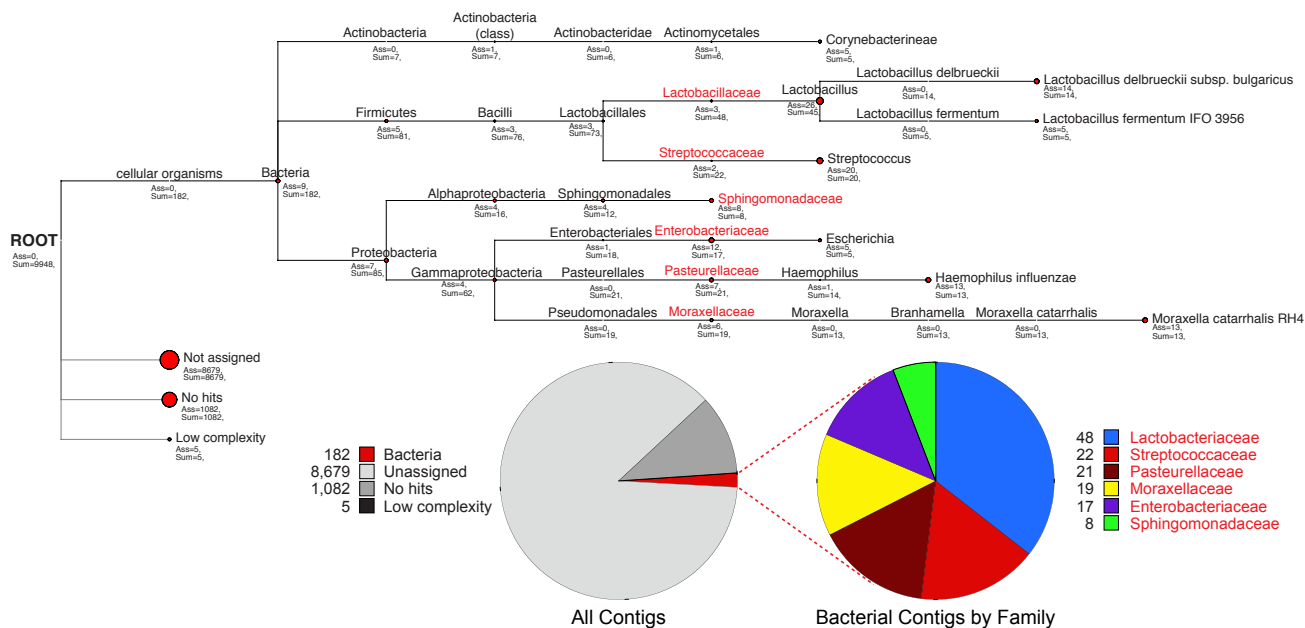



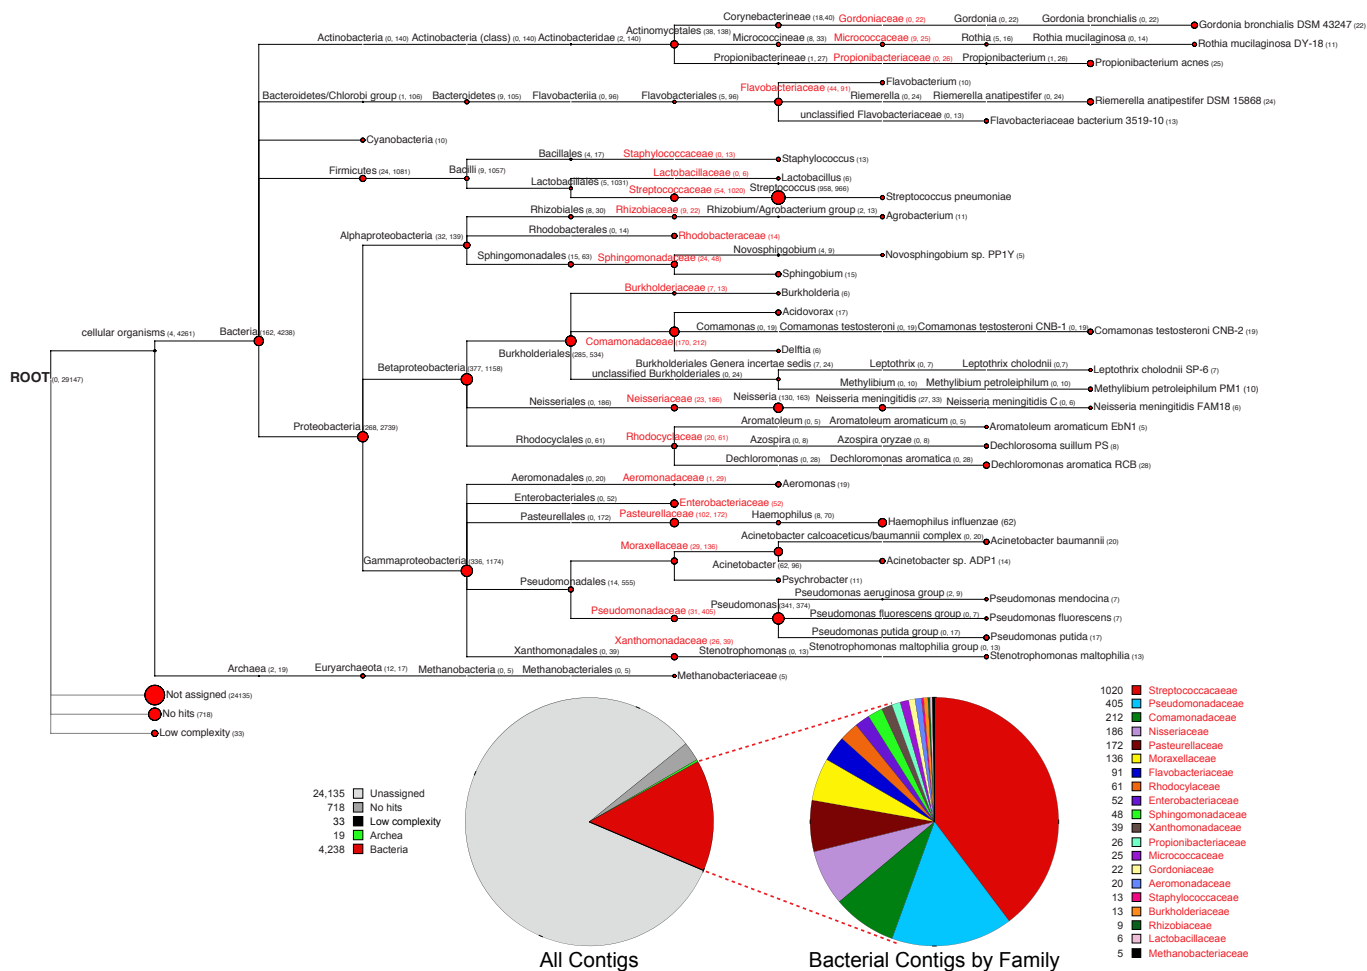

Supplement: NIHMS494800-supplement-Supplementary_Data.pdf [file NIHMS494800-supplement-Supplementary_Data.pdf]
